# Supplementary material for: The Influence of Input Motion Scaling Strategies on Nonlinear Ground Response Analyses of Soft Soil Deposits
Source: MDPI journal article supplement (doi:10.3390/geosciences13010017), 2023-01-06
Supplement: s1 [file s1]

**Table S1.** Main characteristics of the selected earthquake signals based on  $S_a(T_1)$  scaling,  $0.2T_1$ - $2T_1$  scaling, and full spectral matching for 0.15 g intensity level,  $V_{S1}(z)$  and  $H_{deposit} = 50$  m.

|                                                  | Waveform ID | Earthquake ID | Earthquake name               | Date       | Magnitude | Fault mechanism | Epicentral distance (km) |
|--------------------------------------------------|-------------|---------------|-------------------------------|------------|-----------|-----------------|--------------------------|
| Sa( $T_1$ ) scaling                              | 6269        | 1635          | South Iceland                 | 17/06/2000 | 6.5       | strike slip     | 34                       |
|                                                  | 5085        | 1464          | Mt. Hengill Area              | 04/06/1998 | 5.4       | strike slip     | 15                       |
|                                                  | 6335        | 2142          | South Iceland (aftershock)    | 21/06/2000 | 6.4       | strike slip     | 15                       |
|                                                  | 182         | 87            | Tabas                         | 16/09/1978 | 7.3       | oblique         | 12                       |
|                                                  | 1795        | 191           | Golbasi                       | 06/06/1986 | 5.8       | strike slip     | 52                       |
|                                                  | 1960        | 676           | Near NE coast of Rodos island | 25/10/1987 | 5.1       | -               | 19                       |
|                                                  | 4678        | 1635          | South Iceland                 | 17/06/2000 | 6.5       | strike slip     | 32                       |
| 0.2 $T_1$ -2 $T_1$ scaling and Spectral matching | 292         | 146           | Campano Lucano                | 23/11/1980 | 6.9       | normal          | 25                       |
|                                                  | 5814        | 1885          | Kalamata                      | 13/10/1997 | 6.4       | thrust          | 61                       |
|                                                  | 292         | 146           | Campano Lucano                | 23/11/1980 | 6.9       | normal          | 25                       |
|                                                  | 5825        | 1885          | Kalamata                      | 13/10/1997 | 6.4       | thrust          | 103                      |
|                                                  | 5814        | 1885          | Kalamata                      | 13/10/1997 | 6.4       | thrust          | 61                       |
|                                                  | 368         | 175           | Lazio Abruzzo                 | 07/05/1984 | 5.9       | normal          | 22                       |
|                                                  | 290         | 146           | Campano Lucano                | 29548      | 6.9       | normal          | 32                       |

**Table S2.** Main characteristics of the selected earthquake signals based on  $S_a(T_1)$  scaling,  $0.2T_1$ - $2T_1$  scaling, and full spectral matching for 0.35 g intensity level,  $V_{S1}(z)$  and  $H_{deposit} = 50$  m.

|                                                     | Waveform<br>ID | Earthquake<br>ID | Earthquake<br>name         | Date       | Magnitude | Fault<br>mechanism | Epicentral<br>distance<br>(km) |
|-----------------------------------------------------|----------------|------------------|----------------------------|------------|-----------|--------------------|--------------------------------|
| Sa( $T_1$ ) scaling                                 | 6269           | 1635             | South Iceland              | 17/06/2000 | 6.5       | strike slip        | 34                             |
|                                                     | 5085           | 1464             | Mt. Hengill Area           | 04/06/1998 | 5.4       | strike slip        | 15                             |
|                                                     | 6335           | 2142             | South Iceland (aftershock) | 21/06/2000 | 6.4       | strike slip        | 15                             |
|                                                     | 5820           | 1887             | Strofades                  | 18/11/1997 | 6.6       | oblique            | 136                            |
|                                                     | 287            | 146              | Campano Lucano             | 23/11/1980 | 6.9       | normal             | 23                             |
|                                                     | 4674           | 1635             | South Iceland              | 17/06/2000 | 6.5       | strike slip        | 5                              |
|                                                     | 6332           | 2142             | South Iceland (aftershock) | 21/06/2000 | 6.4       | strike slip        | 6                              |
| 0.2 $T_1$ -2 $T_1$ scaling and<br>Spectral matching | 292            | 146              | Campano Lucano             | 23/11/1980 | 6.9       | normal             | 25                             |
|                                                     | 5814           | 1885             | Kalamata                   | 13/10/1997 | 6.4       | thrust             | 61                             |
|                                                     | 292            | 146              | Campano Lucano             | 23/11/1980 | 6.9       | normal             | 25                             |
|                                                     | 7142           | 2309             | Bingol                     | 01/05/2003 | 6.3       | strike slip        | 14                             |
|                                                     | 4674           | 1635             | South Iceland              | 17/06/2000 | 6.5       | strike slip        | 5                              |
|                                                     | 1228           | 472              | Izmit                      | 17/08/1999 | 7.6       | strike slip        | 47                             |
|                                                     | 55             | 34               | Friuli                     | 06/05/1976 | 6.5       | thrust             | 23                             |

**Table S3.** Main characteristics of the selected earthquake signals based on Sa(T<sub>1</sub>) scaling, 0.2T<sub>1</sub>-2T<sub>1</sub> scaling, and full spectral matching for 0.15 g intensity level, V<sub>S1</sub>(z) and H<sub>deposit</sub> = 30 m.

|                                                                     | Waveform<br>ID | Earthquake<br>ID | Earthquake<br>name         | Date       | Magnitude | Fault<br>mechanism | Epicentral<br>distance<br>(km) |
|---------------------------------------------------------------------|----------------|------------------|----------------------------|------------|-----------|--------------------|--------------------------------|
| Sa(T <sub>1</sub> ) scaling                                         | 6437           | 2158             | Izmit (aftershock)         | 07/11/1999 | 4.9       | thrust             | 7                              |
|                                                                     | 90             | 51               | Friuli (aftershock)        | 11/06/1976 | 4.7       | thrust             | 17                             |
|                                                                     | 479            | 230              | Manjil                     | 20/06/1990 | 7.4       | oblique            | 81                             |
|                                                                     | 54             | 34               | Friuli                     | 06/05/1976 | 6.5       | thrust             | 166                            |
|                                                                     | 6169           | 594              | Off coast of Levkas island | 01/12/1994 | 5.3       | strike slip        | 19                             |
|                                                                     | 5797           | 1771             | Gulf of Akaba              | 22/11/1995 | 7.1       | oblique            | 244                            |
|                                                                     | 7116           | 2302             | Pulumur                    | 27/01/2003 | 6         | strike slip        | 109                            |
| 0.2T <sub>1</sub> -2T <sub>1</sub> scaling and<br>Spectral matching | 5820           | 1887             | Strofades                  | 18/11/1997 | 6.6       | oblique            | 136                            |
|                                                                     | 5825           | 1885             | Kalamata                   | 13/10/1997 | 6.4       | thrust             | 103                            |
|                                                                     | 342            | 307              | Cazulas                    | 24/06/1984 | 4.9       | oblique            | 24                             |
|                                                                     | 3725           | 497              | Duzce 1                    | 12/11/1999 | 7.2       | oblique            | 174                            |
|                                                                     | 960            | 424              | Sicilia-Orientale          | 13/12/1990 | 5.6       | strike slip        | 50                             |
|                                                                     | 7160           | 2313             | Firuzabad                  | 20/06/1994 | 5.9       | strike slip        | 58                             |
|                                                                     | 198            | 93               | Montenegro                 | 15/04/1979 | 6.9       | thrust             | 21                             |

**Table S4.** Main characteristics of the selected earthquake signals based on  $S_a(T_1)$  scaling,  $0.2T_1$ - $2T_1$  scaling, and full spectral matching for 0.35 g intensity level,  $V_{S1}(z)$  and  $H_{deposit} = 30$  m.

|                                                     | Waveform<br>ID | Earthquake<br>ID | Earthquake<br>name         | Date       | Magnitude | Fault<br>mechanism | Epicentral<br>distance<br>(km) |
|-----------------------------------------------------|----------------|------------------|----------------------------|------------|-----------|--------------------|--------------------------------|
| Sa( $T_1$ ) scaling                                 | 6437           | 2158             | Izmit (aftershock)         | 07/11/1999 | 4.9       | thrust             | 7                              |
|                                                     | 90             | 51               | Friuli (aftershock)        | 11/06/1976 | 4.7       | thrust             | 17                             |
|                                                     | 479            | 230              | Manjil                     | 20/06/1990 | 7.4       | oblique            | 81                             |
|                                                     | 54             | 34               | Friuli                     | 06/05/1976 | 6.5       | thrust             | 166                            |
|                                                     | 6169           | 594              | Off coast of Levkas island | 01/12/1994 | 5.3       | strike slip        | 19                             |
|                                                     | 1882           | 648              | Ierissos                   | 26/08/1983 | 5.1       | strike slip        | 8                              |
|                                                     | 1229           | 472              | Izmit                      | 17/08/1999 | 7.6       | strike slip        | 73                             |
| 0.2 $T_1$ - $2T_1$ scaling and<br>Spectral matching | 5825           | 1885             | Kalamata                   | 13/10/1997 | 6.4       | thrust             | 103                            |
|                                                     | 342            | 307              | Cazulas                    | 24/06/1984 | 4.9       | oblique            | 24                             |
|                                                     | 960            | 424              | Sicilia-Orientale          | 13/12/1990 | 5.6       | strike slip        | 50                             |
|                                                     | 234            | 108              | Montenegro (aftershock)    | 24/05/1979 | 6.2       | thrust             | 30                             |
|                                                     | 7142           | 2309             | Bingol                     | 01/05/2003 | 6.3       | strike slip        | 14                             |
|                                                     | 6349           | 2142             | South Iceland (aftershock) | 21/06/2000 | 6.4       | strike slip        | 5                              |
|                                                     | 55             | 34               | Friuli                     | 06/05/1976 | 6.5       | thrust             | 23                             |

**Table S5.** Main characteristics of the selected earthquake signals based on  $S_a(T_1)$  scaling,  $0.2T_1$ - $2T_1$  scaling, and full spectral matching for 0.15 g intensity level,  $V_{S1}(z)$  and  $H_{deposit} = 15$  m.

|                                                                                | Waveform<br>ID | Earthquake<br>ID | Earthquake<br>name            | Date       | Magnitude | Fault<br>mechanism | Epicentral<br>distance<br>(km) |
|--------------------------------------------------------------------------------|----------------|------------------|-------------------------------|------------|-----------|--------------------|--------------------------------|
| <b><math>S_a(T_1)</math> scaling</b>                                           | 200            | 93               | Montenegro                    | 15/04/1979 | 6.9       | thrust             | 65                             |
|                                                                                | 385            | 176              | Lazio Abruzzo (aftershock)    | 11/05/1984 | 5.5       | normal             | 15                             |
|                                                                                | 7160           | 2313             | Firuzabad                     | 20/06/1994 | 5.9       | strike slip        | 58                             |
|                                                                                | 401            | 181              | Lazio Abruzzo (aftershock)    | 11/05/1984 | 4.8       | normal             | 16                             |
|                                                                                | 5828           | 1896             | Strofades (aftershock)        | 18/11/1997 | 5.3       | strike slip        | 43                             |
|                                                                                | 5814           | 1885             | Kalamata                      | 13/10/1997 | 6.4       | thrust             | 61                             |
|                                                                                | 372            | 175              | Lazio Abruzzo                 | 07/05/1984 | 5.9       | normal             | 68                             |
| <b><math>0.2T_1</math>-<math>2T_1</math> scaling and<br/>Spectral matching</b> | 5271           | 1338             | Mt. Vatnafjoll                | 25/05/1987 | 6         | oblique            | 42                             |
|                                                                                | 3725           | 497              | Duzce 1                       | 12/11/1999 | 7.2       | oblique            | 174                            |
|                                                                                | 642            | 292              | Umbria Marche<br>(aftershock) | 14/10/1997 | 5.6       | normal             | 23                             |
|                                                                                | 960            | 424              | Sicilia-Orientale             | 13/12/1990 | 5.6       | strike slip        | 50                             |
|                                                                                | 5825           | 1885             | Kalamata                      | 13/10/1997 | 6.4       | thrust             | 103                            |
|                                                                                | 195            | 93               | Montenegro                    | 15/04/1979 | 6.9       | thrust             | 55                             |
|                                                                                | 7142           | 2309             | Bingol                        | 01/05/2003 | 6.3       | strike slip        | 14                             |

**Table S6.** Main characteristics of the selected earthquake signals based on  $S_a(T_1)$  scaling,  $0.2T_1$ - $2T_1$  scaling, and full spectral matching for 0.35 g intensity level,  $V_{S1}(z)$  and  $H_{deposit} = 15$  m.

|                                                                                | Waveform<br>ID | Earthquake<br>ID | Earthquake<br>name            | Date       | Magnitude | Fault<br>mechanism | Epicentral<br>distance<br>(km) |
|--------------------------------------------------------------------------------|----------------|------------------|-------------------------------|------------|-----------|--------------------|--------------------------------|
| <b><math>S_a(T_1)</math> scaling</b>                                           | 490            | 235              | Javakheti Highland            | 16/12/1990 | 5.4       | strike slip        | 29                             |
|                                                                                | 7281           | 2336             | Azores (aftershock)           | 28/06/1997 | 5.1       | normal             | 131                            |
|                                                                                | 200            | 93               | Montenegro                    | 15/04/1979 | 6.9       | thrust             | 65                             |
|                                                                                | 6444           | 2159             | Izmit (aftershock)            | 11/11/1999 | 5.6       | oblique            | 31                             |
|                                                                                | 385            | 176              | Lazio Abruzzo (aftershock)    | 11/05/1984 | 5.5       | normal             | 15                             |
|                                                                                | 6263           | 1635             | South Iceland                 | 17/06/2000 | 6.5       | strike slip        | 7                              |
|                                                                                | 147            | 65               | Friuli (aftershock)           | 15/09/1976 | 6         | thrust             | 14                             |
| <b><math>0.2T_1</math>-<math>2T_1</math> scaling and<br/>Spectral matching</b> | 5271           | 1338             | Mt. Vatnafjoll                | 25/05/1987 | 6         | oblique            | 42                             |
|                                                                                | 3725           | 497              | Duzce 1                       | 12/11/1999 | 7.2       | oblique            | 174                            |
|                                                                                | 642            | 292              | Umbria Marche<br>(aftershock) | 14/10/1997 | 5.6       | normal             | 23                             |
|                                                                                | 960            | 424              | Sicilia-Orientale             | 13/12/1990 | 5.6       | strike slip        | 50                             |
|                                                                                | 6500           | 497              | Duzce 1                       | 12/11/1999 | 7.2       | oblique            | 23                             |
|                                                                                | 372            | 175              | Lazio Abruzzo                 | 07/05/1984 | 5.9       | normal             | 68                             |
|                                                                                | 182            | 87               | Tabas                         | 16/09/1978 | 7.3       | oblique            | 12                             |

**Table S7.** Main characteristics of the selected earthquake signals based on  $S_a(T_1)$  scaling,  $0.2T_1$ - $2T_1$  scaling, and full spectral matching for 0.15 g intensity level,  $V_{s2}(z)$  and  $H_{deposit} = 50$  m.

|                                                     | Waveform<br>ID | Earthquake<br>ID | Earthquake<br>name | Date       | Magnitude | Fault<br>mechanism | Epicentral<br>distance<br>(km) |
|-----------------------------------------------------|----------------|------------------|--------------------|------------|-----------|--------------------|--------------------------------|
| Sa( $T_1$ ) scaling                                 | 6174           | 2029             | Kozani             | 13/05/1995 | 6.5       | normal             | 60                             |
|                                                     | 1228           | 472              | Izmit              | 17/08/1999 | 7.6       | strike slip        | 47                             |
|                                                     | 6761           | 2222             | Vrancea            | 30/08/1986 | 7.2       | thrust             | 49                             |
|                                                     | 1878           | 192              | Kalamata           | 13/09/1986 | 5.9       | normal             | 51                             |
|                                                     | 949            | 424              | Sicilia-Orientale  | 13/12/1990 | 5.6       | strike slip        | 29                             |
|                                                     | 1243           | 473              | Izmit (aftershock) | 13/09/1999 | 5.8       | oblique            | 15                             |
|                                                     | 198            | 93               | Montenegro         | 15/04/1979 | 6.9       | thrust             | 21                             |
| 0.2 $T_1$ -2 $T_1$ scaling and<br>Spectral matching | 5814           | 1885             | Kalamata           | 13/10/1997 | 6.4       | thrust             | 61                             |
|                                                     | 5825           | 1885             | Kalamata           | 13/10/1997 | 6.4       | thrust             | 103                            |
|                                                     | 616            | 286              | Umbria Marche      | 26/09/1997 | 6         | normal             | 59                             |
|                                                     | 368            | 175              | Lazio Abruzzo      | 07/05/1984 | 5.9       | normal             | 22                             |
|                                                     | 7142           | 2309             | Bingol             | 01/05/2003 | 6.3       | strike slip        | 14                             |
|                                                     | 55             | 34               | Friuli             | 06/05/1976 | 6.5       | thrust             | 23                             |
|                                                     | 290            | 146              | Campano Lucano     | 23/11/1980 | 6.9       | normal             | 32                             |

**Table S8.** Main characteristics of the selected earthquake signals based on  $S_a(T_1)$  scaling,  $0.2T_1$ - $2T_1$  scaling, and full spectral matching for 0.35 g intensity level,  $V_{s2}(z)$  and  $H_{deposit} = 50$  m.

|                                                     | Waveform<br>ID | Earthquake<br>ID | Earthquake<br>name         | Date       | Magnitude | Fault<br>mechanism | Epicentral<br>distance<br>(km) |
|-----------------------------------------------------|----------------|------------------|----------------------------|------------|-----------|--------------------|--------------------------------|
| Sa( $T_1$ ) scaling                                 | 6174           | 2029             | Kozani                     | 13/05/1995 | 6.5       | normal             | 60                             |
|                                                     | 1228           | 472              | Izmit                      | 17/08/1999 | 7.6       | strike slip        | 47                             |
|                                                     | 6761           | 2222             | Vrancea                    | 30/08/1986 | 7.2       | thrust             | 49                             |
|                                                     | 5807           | 1885             | Kalamata                   | 13/10/1997 | 6.4       | thrust             | 93                             |
|                                                     | 6332           | 2142             | South Iceland (aftershock) | 21/06/2000 | 6.4       | strike slip        | 6                              |
|                                                     | 290            | 146              | Campano Lucano             | 23/11/1980 | 6.9       | normal             | 32                             |
|                                                     | 6349           | 2142             | South Iceland (aftershock) | 21/06/2000 | 6.4       | strike slip        | 5                              |
| 0.2 $T_1$ -2 $T_1$ scaling and<br>Spectral matching | 292            | 146              | Campano Lucano             | 23/11/1980 | 6.9       | normal             | 25                             |
|                                                     | 5814           | 1885             | Kalamata                   | 13/10/1997 | 6.4       | thrust             | 61                             |
|                                                     | 368            | 175              | Lazio Abruzzo              | 07/05/1984 | 5.9       | normal             | 22                             |
|                                                     | 6761           | 2222             | Vrancea                    | 30/08/1986 | 7.2       | thrust             | 49                             |
|                                                     | 182            | 87               | Tabas                      | 16/09/1978 | 7.3       | oblique            | 12                             |
|                                                     | 4674           | 1635             | South Iceland              | 17/06/2000 | 6.5       | strike slip        | 5                              |
|                                                     | 1231           | 472              | Izmit                      | 17/08/1999 | 7.6       | strike slip        | 9                              |



**Table S9.** Main characteristics of the selected earthquake signals based on  $S_a(T_1)$  scaling,  $0.2T_1$ - $2T_1$  scaling, and full spectral matching for 0.15 g intensity level,  $V_{s2}(z)$  and  $H_{deposit} = 30$  m.

|                                                                                | Waveform<br>ID | Earthquake<br>ID | Earthquake<br>name            | Date       | Magnitude | Fault<br>mechanism | Epicentral<br>distance<br>(km) |
|--------------------------------------------------------------------------------|----------------|------------------|-------------------------------|------------|-----------|--------------------|--------------------------------|
| <b><math>S_a(T_1)</math> scaling</b>                                           | 629            | 291              | Umbria Marche<br>(aftershock) | 06/10/1997 | 5.5       | normal             | 36                             |
|                                                                                | 961            | 424              | Sicilia-Orientale             | 13/12/1990 | 5.6       | strike slip        | 51                             |
|                                                                                | 949            | 424              | Sicilia-Orientale             | 13/12/1990 | 5.6       | strike slip        | 29                             |
|                                                                                | 4674           | 1635             | South Iceland                 | 17/06/2000 | 6.5       | strike slip        | 5                              |
|                                                                                | 473            | 228              | Vrancea                       | 31/05/1990 | 6.3       | thrust             | 7                              |
|                                                                                | 949            | 424              | Sicilia-Orientale             | 13/12/1990 | 5.6       | strike slip        | 29                             |
|                                                                                | 1231           | 472              | Izmit                         | 17/08/1999 | 7.6       | strike slip        | 9                              |
| <b><math>0.2T_1</math>-<math>2T_1</math> scaling and<br/>Spectral matching</b> | 292            | 146              | Campano Lucano                | 23/11/1980 | 6.9       | normal             | 25                             |
|                                                                                | 5814           | 1885             | Kalamata                      | 13/10/1997 | 6.4       | thrust             | 61                             |
|                                                                                | 5825           | 1885             | Kalamata                      | 13/10/1997 | 6.4       | thrust             | 103                            |
|                                                                                | 292            | 146              | Campano Lucano                | 23/11/1980 | 6.9       | normal             | 25                             |
|                                                                                | 368            | 175              | Lazio Abruzzo                 | 07/05/1984 | 5.9       | normal             | 22                             |
|                                                                                | 5814           | 1885             | Kalamata                      | 13/10/1997 | 6.4       | thrust             | 61                             |
|                                                                                | 198            | 93               | Montenegro                    | 15/04/1979 | 6.9       | thrust             | 21                             |

**Table S10.** Main characteristics of the selected earthquake signals based on  $S_a(T_1)$  scaling,  $0.2T_1$ - $2T_1$  scaling, and full spectral matching for 0.35 g intensity level,  $V_{s2}(z)$  and  $H_{deposit} = 30$  m.

|                                                                                | Waveform<br>ID | Earthquake<br>ID | Earthquake<br>name            | Date       | Magnitude | Fault<br>mechanism | Epicentral<br>distance<br>(km) |
|--------------------------------------------------------------------------------|----------------|------------------|-------------------------------|------------|-----------|--------------------|--------------------------------|
| <b><math>S_a(T_1)</math> scaling</b>                                           | 629            | 291              | Umbria Marche<br>(aftershock) | 06/10/1997 | 5.5       | normal             | 36                             |
|                                                                                | 961            | 424              | Sicilia-Orientale             | 13/12/1990 | 5.6       | strike slip        | 51                             |
|                                                                                | 949            | 424              | Sicilia-Orientale             | 13/12/1990 | 5.6       | strike slip        | 29                             |
|                                                                                | 4674           | 1635             | South Iceland                 | 17/06/2000 | 6.5       | strike slip        | 5                              |
|                                                                                | 6332           | 2142             | South Iceland (aftershock)    | 21/06/2000 | 6.4       | strike slip        | 6                              |
|                                                                                | 7142           | 2309             | Bingol                        | 01/05/2003 | 6.3       | strike slip        | 14                             |
|                                                                                | 6349           | 2142             | South Iceland (aftershock)    | 21/06/2000 | 6.4       | strike slip        | 5                              |
| <b><math>0.2T_1</math>-<math>2T_1</math> scaling and<br/>Spectral matching</b> | 292            | 146              | Campano Lucano                | 23/11/1980 | 6.9       | normal             | 25                             |
|                                                                                | 5814           | 1885             | Kalamata                      | 13/10/1997 | 6.4       | thrust             | 61                             |
|                                                                                | 292            | 146              | Campano Lucano                | 23/11/1980 | 6.9       | normal             | 25                             |
|                                                                                | 5819           | 1885             | Kalamata                      | 13/10/1997 | 6.4       | thrust             | 48                             |
|                                                                                | 4674           | 1635             | South Iceland                 | 17/06/2000 | 6.5       | strike slip        | 5                              |
|                                                                                | 290            | 146              | Campano Lucano                | 23/11/1980 | 6.9       | normal             | 32                             |
|                                                                                | 55             | 34               | Friuli                        | 06/05/1976 | 6.5       | thrust             | 23                             |

**Table S11.** Main characteristics of the selected earthquake signals based on  $S_a(T_1)$  scaling,  $0.2T_1$ - $2T_1$  scaling, and full spectral matching for 0.15 g intensity level,  $V_{s2}(z)$  and  $H_{\text{deposit}} = 15$  m.

|                                                     | Waveform<br>ID | Earthquake<br>ID | Earthquake<br>name      | Date       | Magnitude | Fault<br>mechanism | Epicentral<br>distance<br>(km) |
|-----------------------------------------------------|----------------|------------------|-------------------------|------------|-----------|--------------------|--------------------------------|
| Sa( $T_1$ ) scaling                                 | 90             | 51               | Friuli (aftershock)     | 11/06/1976 | 4.7       | thrust             | 17                             |
|                                                     | 479            | 230              | Manjil                  | 20/06/1990 | 7.4       | oblique            | 81                             |
|                                                     | 6437           | 2158             | Izmit (aftershock)      | 07/11/1999 | 4.9       | thrust             | 7                              |
|                                                     | 7116           | 2302             | Pulumur                 | 27/01/2003 | 6         | strike slip        | 109                            |
|                                                     | 348            | 168              | Kefallinia (aftershock) | 23/03/1983 | 5.2       | normal             | 11                             |
|                                                     | 141            | 65               | Friuli (aftershock)     | 15/09/1976 | 6         | thrust             | 46                             |
|                                                     | 302            | 146              | Campano Lucano          | 23/11/1980 | 6.9       | normal             | 92                             |
| 0.2 $T_1$ - $2T_1$ scaling and<br>Spectral matching | 5820           | 1887             | Strofades               | 18/11/1997 | 6.6       | oblique            | 136                            |
|                                                     | 342            | 307              | Cazulas                 | 24/06/1984 | 4.9       | oblique            | 24                             |
|                                                     | 5825           | 1885             | Kalamata                | 13/10/1997 | 6.4       | thrust             | 103                            |
|                                                     | 3725           | 497              | Duzce 1                 | 12/11/1999 | 7.2       | oblique            | 174                            |
|                                                     | 960            | 424              | Sicilia-Orientale       | 13/12/1990 | 5.6       | strike slip        | 50                             |
|                                                     | 5814           | 1885             | Kalamata                | 13/10/1997 | 6.4       | thrust             | 61                             |
|                                                     | 1902           | 659              | Anchialos               | 30/04/1985 | 5.6       | normal             | 55                             |

**Table S12.** Main characteristics of the selected earthquake signals based on  $S_a(T_1)$  scaling,  $0.2T_1$ - $2T_1$  scaling, and full spectral matching for 0.35 g intensity level,  $V_{s2}(z)$  and  $H_{deposit} = 15$  m.

|                                                     | Waveform<br>ID | Earthquake<br>ID | Earthquake<br>name      | Date       | Magnitude | Fault<br>mechanism | Epicentral<br>distance<br>(km) |
|-----------------------------------------------------|----------------|------------------|-------------------------|------------|-----------|--------------------|--------------------------------|
| Sa( $T_1$ ) scaling                                 | 90             | 51               | Friuli (aftershock)     | 11/06/1976 | 4.7       | thrust             | 17                             |
|                                                     | 479            | 230              | Manjil                  | 20/06/1990 | 7.4       | oblique            | 81                             |
|                                                     | 6437           | 2158             | Izmit (aftershock)      | 07/11/1999 | 4.9       | thrust             | 7                              |
|                                                     | 348            | 168              | Kefallinia (aftershock) | 23/03/1983 | 5.2       | normal             | 11                             |
|                                                     | 141            | 65               | Friuli (aftershock)     | 15/09/1976 | 6         | thrust             | 46                             |
|                                                     | 1882           | 648              | Ierissos                | 26/08/1983 | 5.1       | strike slip        | 8                              |
|                                                     | 1251           | 472              | Izmit                   | 17/08/1999 | 7.6       | strike slip        | 92                             |
| 0.2 $T_1$ - $2T_1$ scaling and<br>Spectral matching | 439            | 213              | Spitak                  | 07/12/1988 | 6.7       | thrust             | 36                             |
|                                                     | 6968           | 473              | Izmit (aftershock)      | 13/09/1999 | 5.8       | oblique            | 179                            |
|                                                     | 6263           | 1635             | South Iceland           | 17/06/2000 | 6.5       | strike slip        | 7                              |
|                                                     | 5820           | 1887             | Strofades               | 18/11/1997 | 6.6       | oblique            | 136                            |
|                                                     | 7142           | 2309             | Bingol                  | 01/05/2003 | 6.3       | strike slip        | 14                             |
|                                                     | 414            | 192              | Kalamata                | 13/09/1986 | 5.9       | normal             | 11                             |
|                                                     | 146            | 65               | Friuli (aftershock)     | 15/09/1976 | 6         | thrust             | 14                             |

**Table S13.** Main characteristics of the selected earthquake signals based on PGA scaling for 0.15 g intensity level,  $V_{s2}(z)$  and  $H_{\text{deposit}} = 15$  m.

|             | Waveform<br>ID | Earthquake<br>ID | Earthquake<br>name  | Date       | Magnitude | Fault<br>mechanism | Epicentral<br>distance<br>(km) |
|-------------|----------------|------------------|---------------------|------------|-----------|--------------------|--------------------------------|
| PGA scaling | 55             | 34               | Friuli              | 06/05/1976 | 6.5       | thrust             | 23                             |
|             | 59             | 35               | Friuli (aftershock) | 07/05/1976 | 5.2       | thrust             | 27                             |
|             | 95             | 52               | Friuli (aftershock) | 17/06/1976 | 5.2       | oblique            | 26                             |
|             | 128            | 63               | Friuli (aftershock) | 15/09/1976 | 6         | thrust             | 28                             |
|             | 149            | 65               | Friuli (aftershock) | 15/09/1976 | 6         | thrust             | 12                             |
|             | 169            | 80               | Calabria            | 11/03/1978 | 5.2       | normal             | 10                             |
|             | 182            | 87               | Tabas               | 16/09/1978 | 7.3       | oblique            | 12                             |

**Table S14.** Main characteristics of the selected earthquake signals based on PGA scaling for 0.35 g intensity level,  $V_{s2}(z)$  and  $H_{\text{deposit}} = 15$  m.

|             | Waveform<br>ID | Earthquake<br>ID | Earthquake<br>name  | Date       | Magnitude | Fault<br>mechanism | Epicentral<br>distance<br>(km) |
|-------------|----------------|------------------|---------------------|------------|-----------|--------------------|--------------------------------|
| PGA scaling | 55             | 34               | Friuli              | 06/05/1976 | 6.5       | thrust             | 23                             |
|             | 59             | 35               | Friuli (aftershock) | 07/05/1976 | 5.2       | thrust             | 27                             |
|             | 128            | 63               | Friuli (aftershock) | 15/09/1976 | 6         | thrust             | 28                             |
|             | 149            | 65               | Friuli (aftershock) | 15/09/1976 | 6         | thrust             | 12                             |
|             | 169            | 80               | Calabria            | 11/03/1978 | 5.2       | normal             | 10                             |
|             | 182            | 87               | Tabas               | 16/09/1978 | 7.3       | oblique            | 12                             |
|             | 193            | 91               | Montenegro          | 09/04/1979 | 5.4       | thrust             | 15                             |
