# Supplementary material for: The Influence of Input Motion Scaling Strategies on Nonlinear Ground Response Analyses of Soft Soil Deposits
Source: MDPI journal article supplement (doi:10.3390/geosciences13010017), 2023-01-06
Supplement: s1 [file s1]

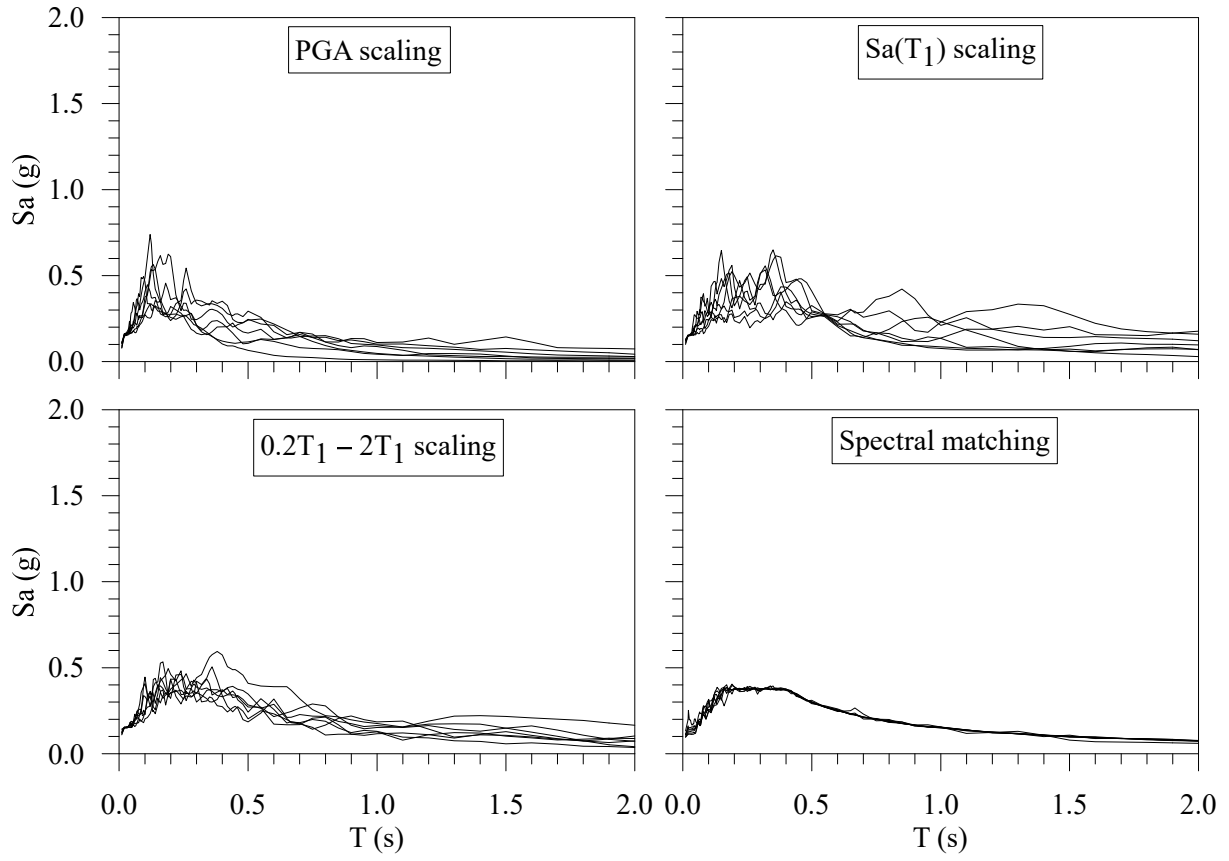

Figure S1. Response spectra in terms of pseudo-acceleration referred to input motions selected according to 4 selection strategies for  $PGA = 0.15$  g and Soil C (i.e.,  $VS_1(z)$  for  $H_{deposit}$  equal to 50 m).

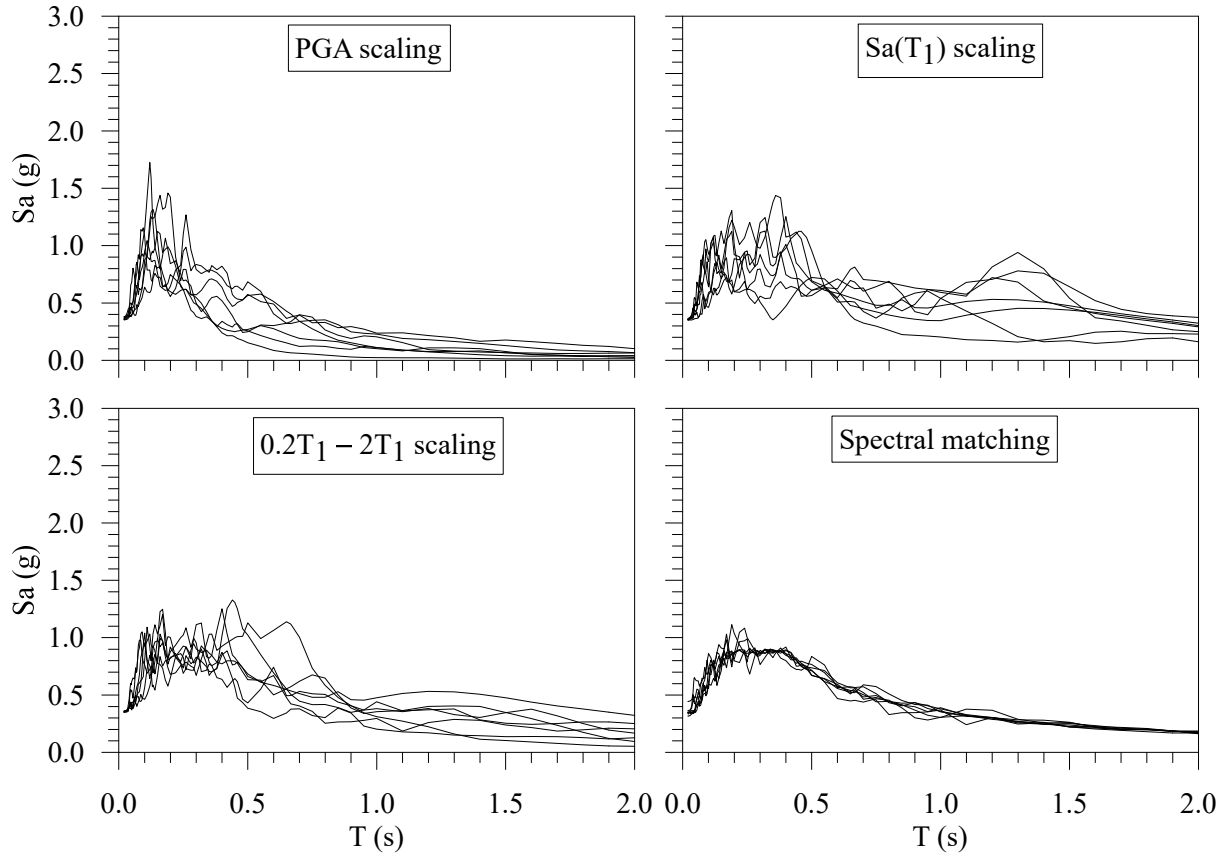

Figure S2. Response spectra in terms of pseudo-acceleration referred to input motions selected according to 4 selection strategies for  $PGA = 0.35$  g and Soil C (i.e.,  $VS_1(z)$  for  $H_{deposit}$  equal to 50 m).

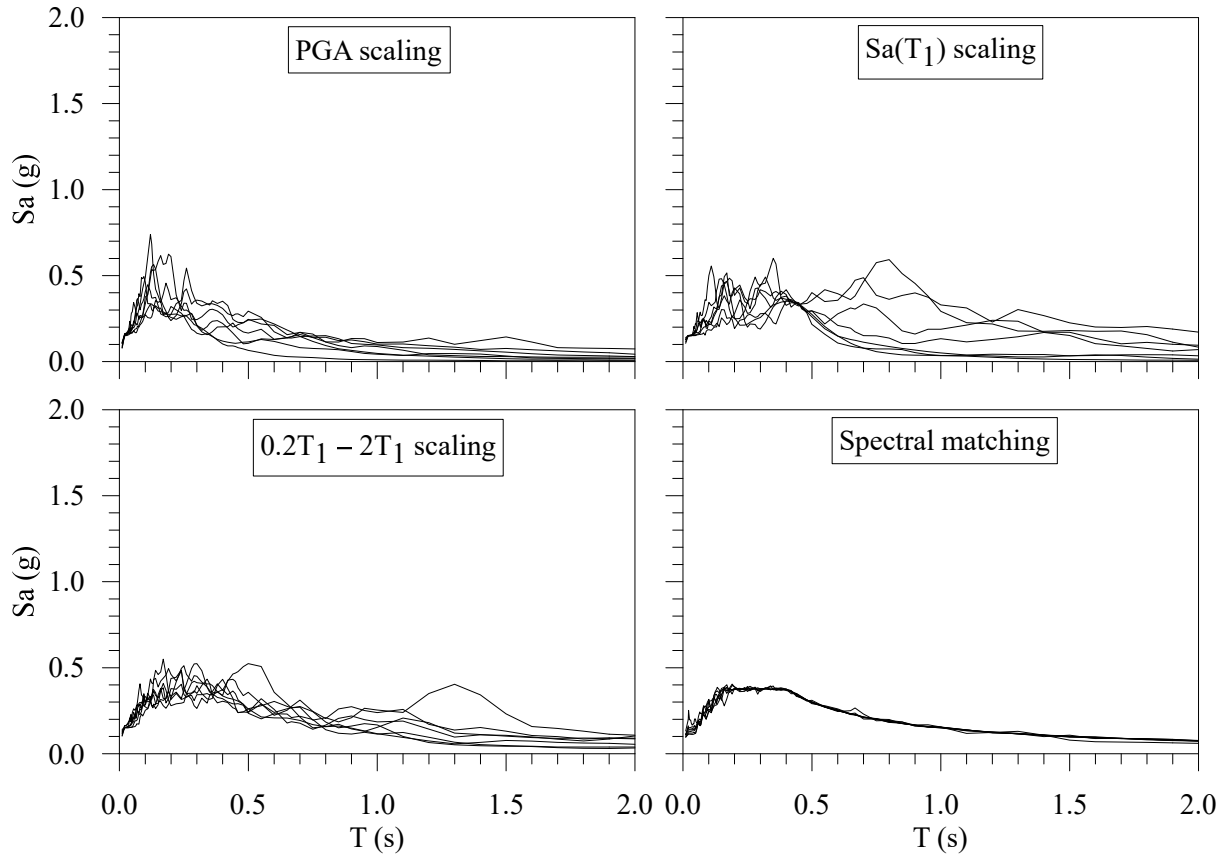

Figure S3. Response spectra in terms of pseudo-acceleration referred to input motions selected according to 4 selection strategies for  $PGA = 0.15$  g and Soil C (i.e.,  $VS_1(z)$  for  $H_{deposit}$  equal to 30 m).

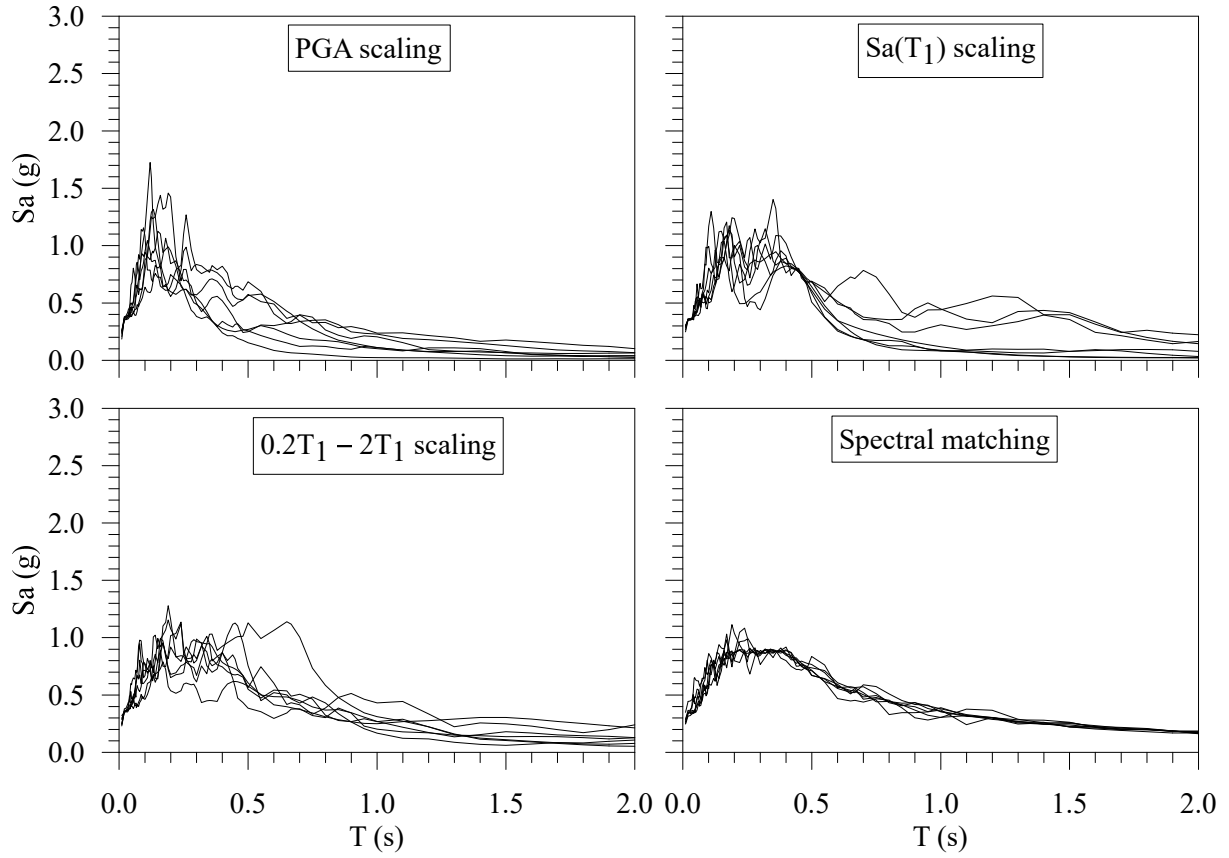

Figure S4. Response spectra in terms of pseudo-acceleration referred to input motions selected according to 4 selection strategies for  $PGA = 0.35$  g and Soil C (i.e.,  $VS_1(z)$  for  $H_{deposit}$  equal to 30 m).

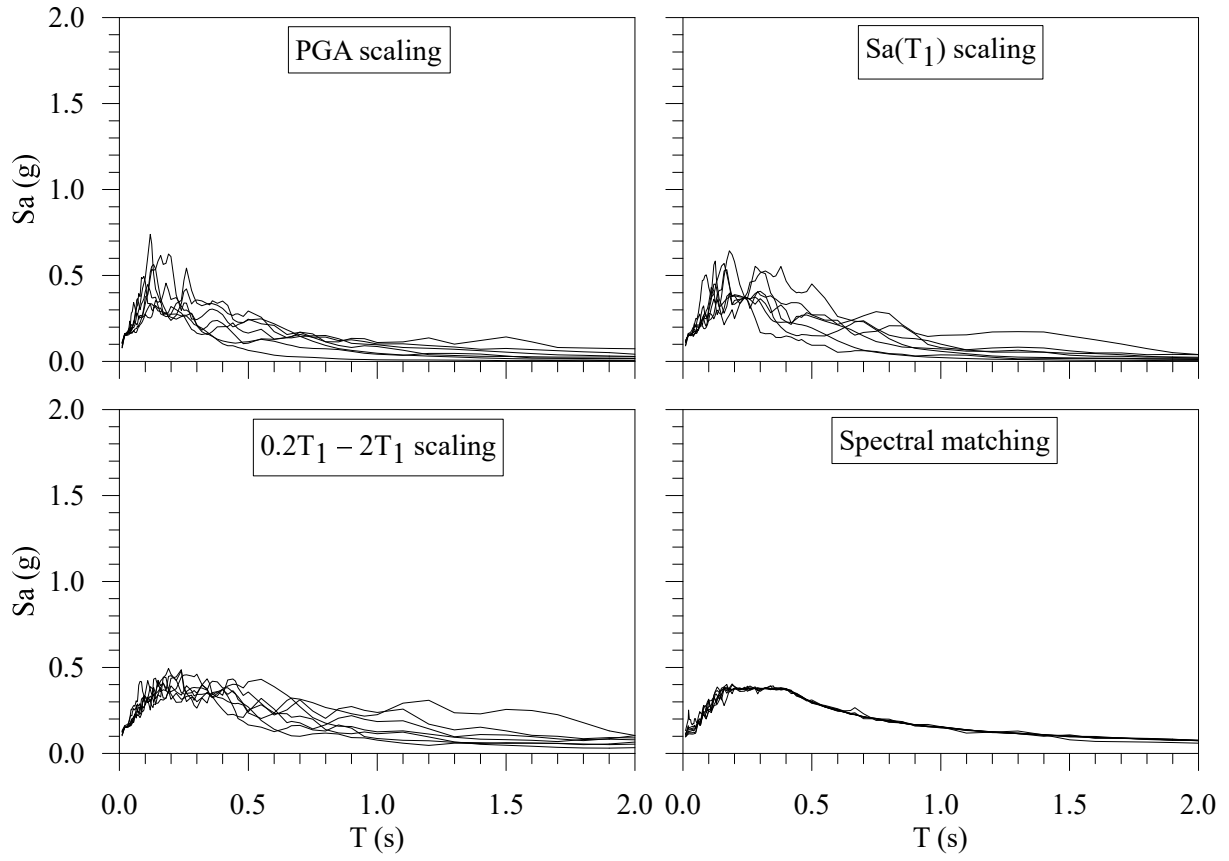

Figure S5. Response spectra in terms of pseudo-acceleration referred to input motions selected according to 4 selection strategies for PGA = 0.15 g and Soil E (i.e., VS<sub>1</sub>(z) for H<sub>deposit</sub> equal to 15 m).

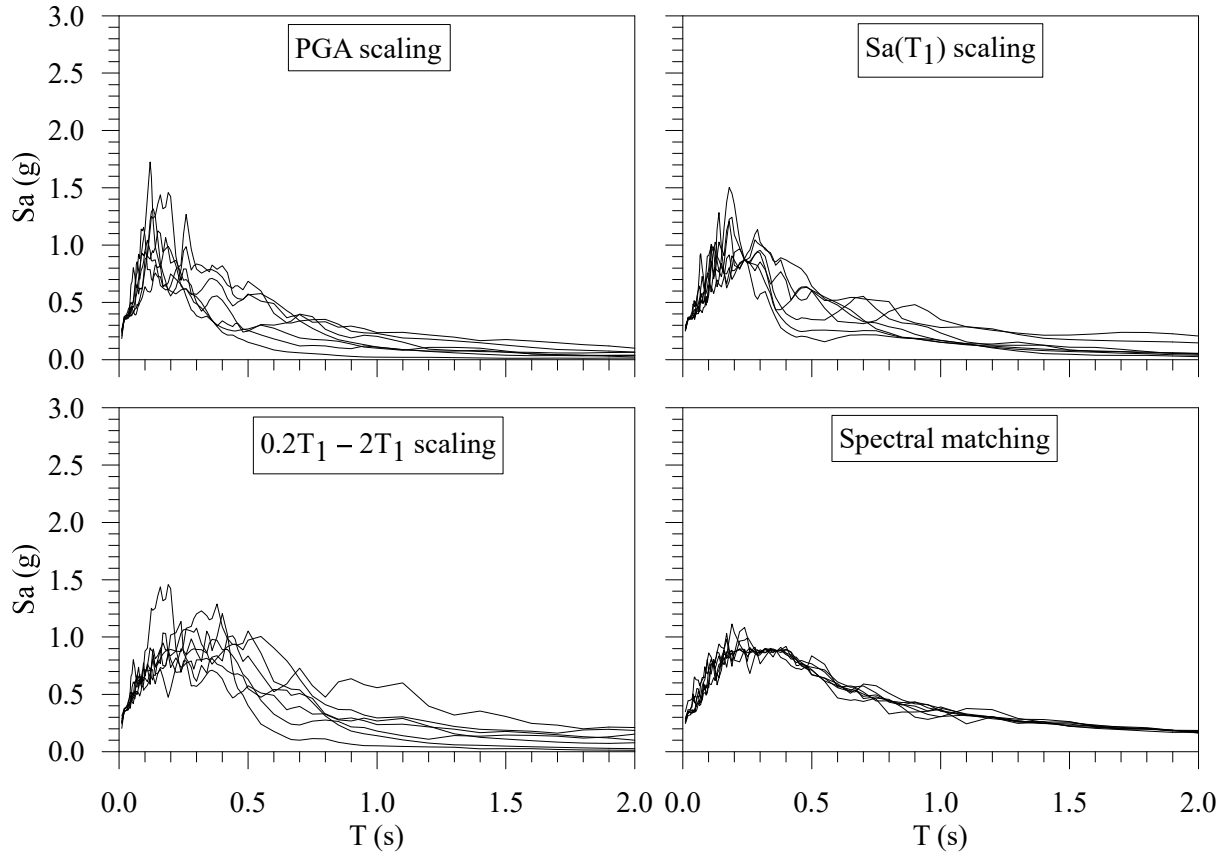

Figure S6. Response spectra in terms of pseudo-acceleration referred to input motions selected according to 4 selection strategies for PGA = 0.35 g and Soil E (i.e., VS<sub>1</sub>(z) for H<sub>deposit</sub> equal to 15 m).

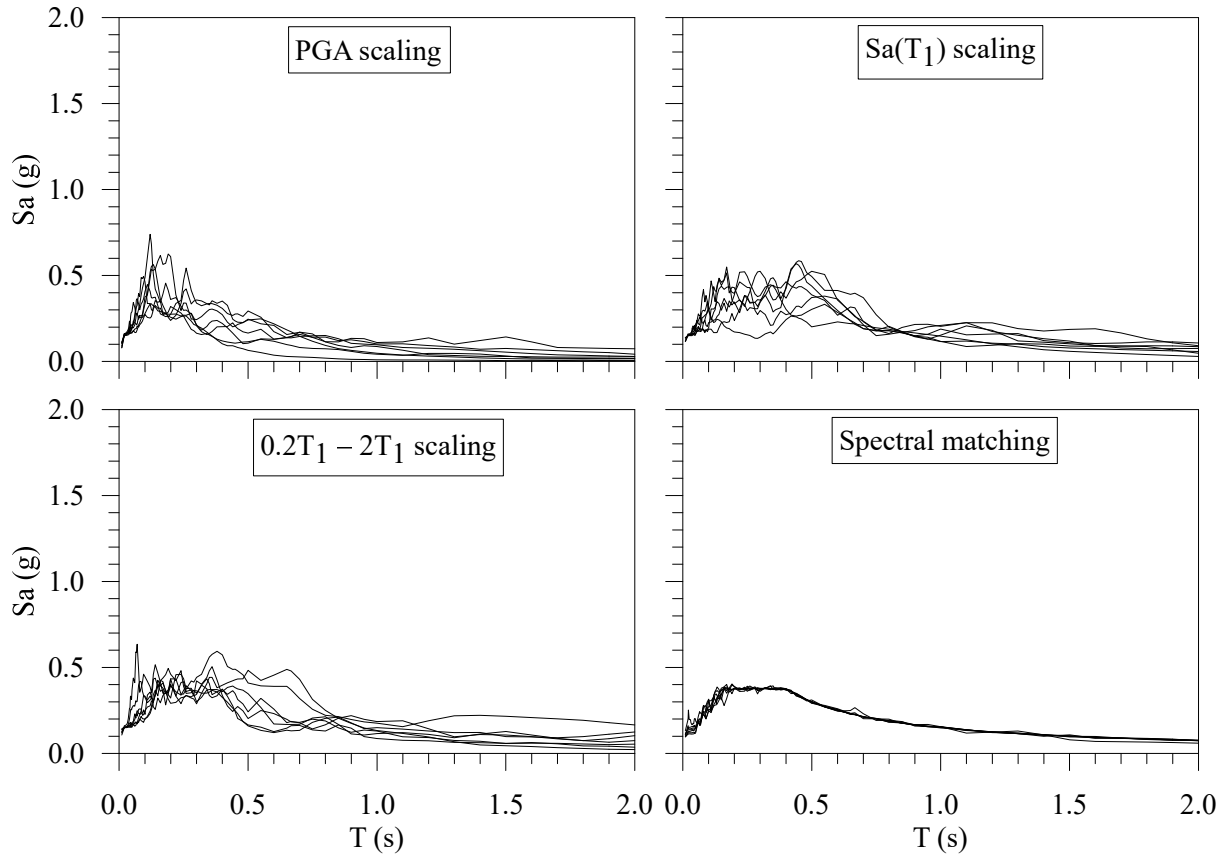

Figure S7. Response spectra in terms of pseudo-acceleration referred to input motions selected according to 4 selection strategies for PGA = 0.15 g and Soil D (i.e., VS<sub>2</sub>(z) for H<sub>deposit</sub> equal to 50 m).

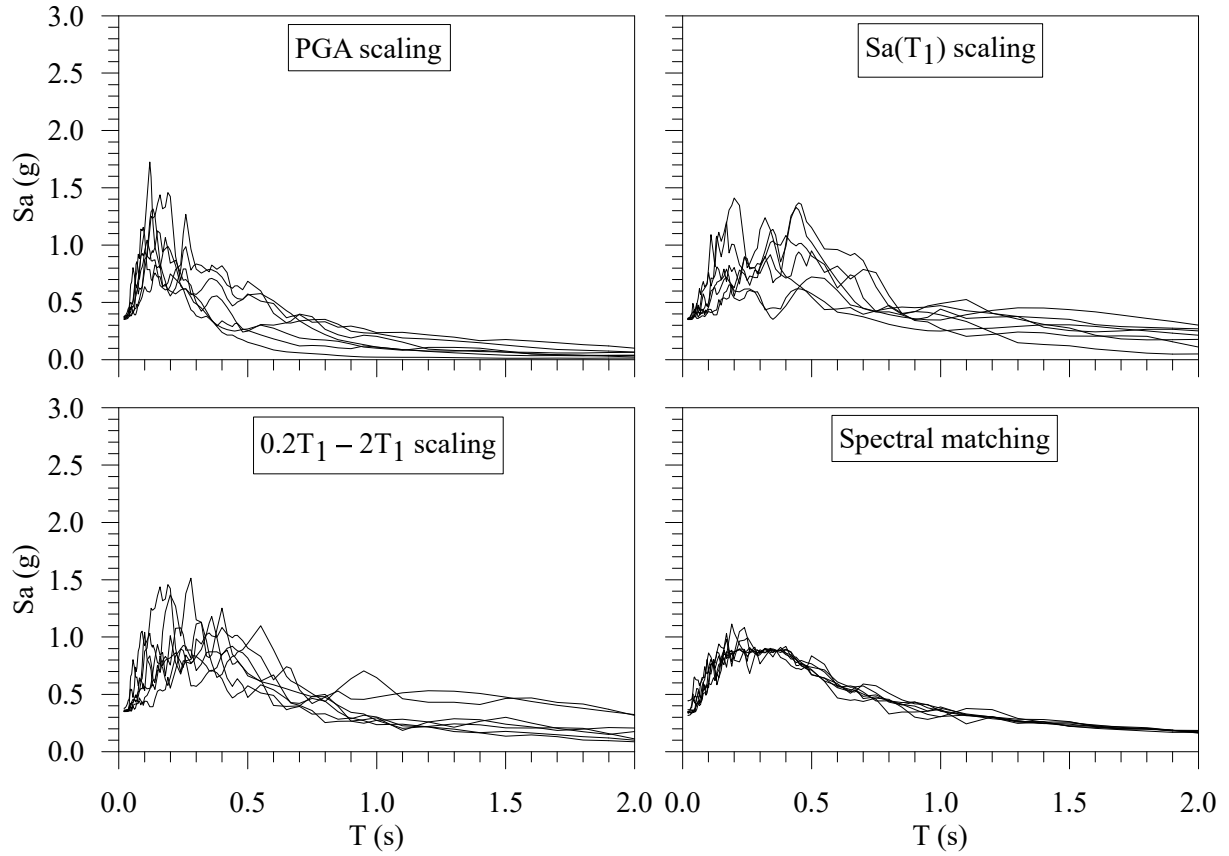

Figure S8. Response spectra in terms of pseudo-acceleration referred to input motions selected according to 4 selection strategies for PGA = 0.35 g and Soil D (i.e., VS<sub>2</sub>(z) for H<sub>deposit</sub> equal to 50 m).

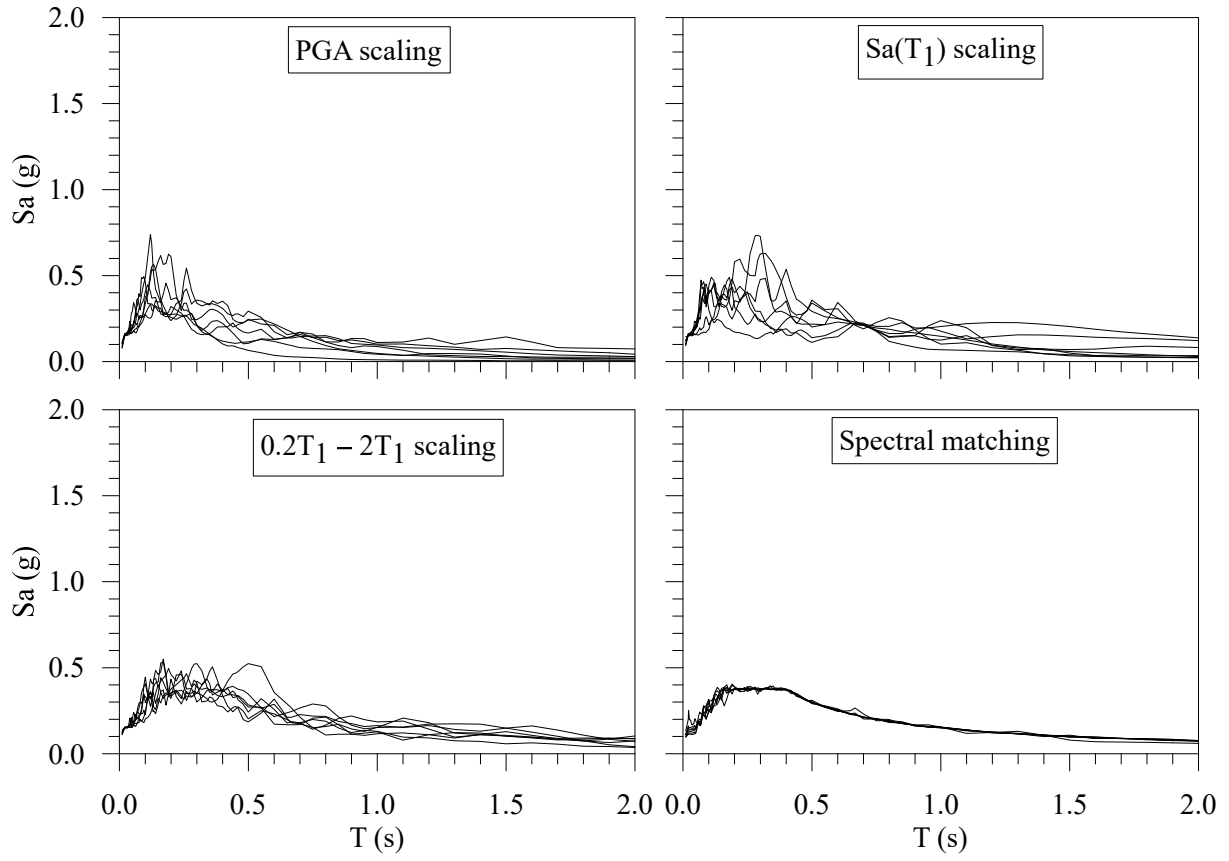

Figure S9. Response spectra in terms of pseudo-acceleration referred to input motions selected according to 4 selection strategies for PGA = 0.15 g and Soil D (i.e., VS<sub>2</sub>(z) for H<sub>deposit</sub> equal to 30 m).

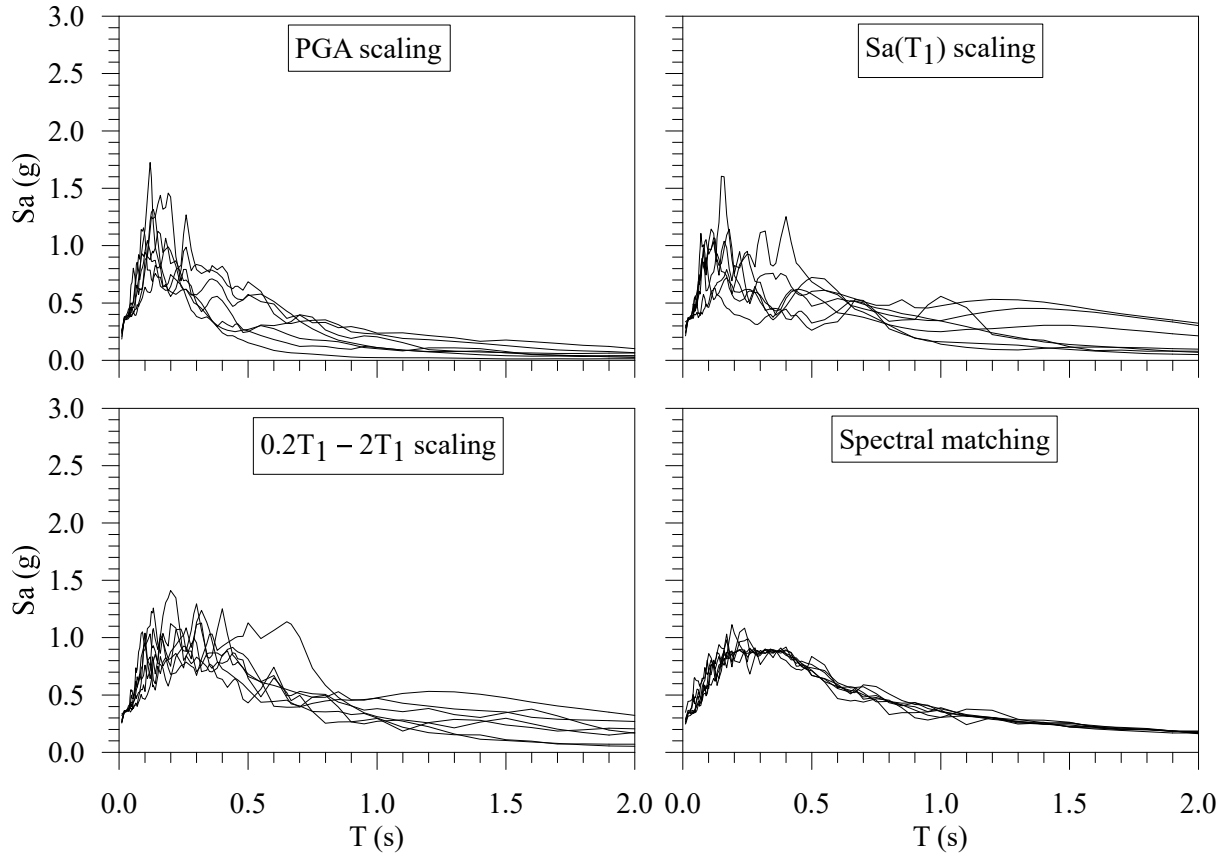

Figure S10. Response spectra in terms of pseudo-acceleration referred to input motions selected according to 4 selection strategies for PGA = 0.35 g and Soil D (i.e., VS<sub>2</sub>(z) for H<sub>deposit</sub> equal to 30 m).

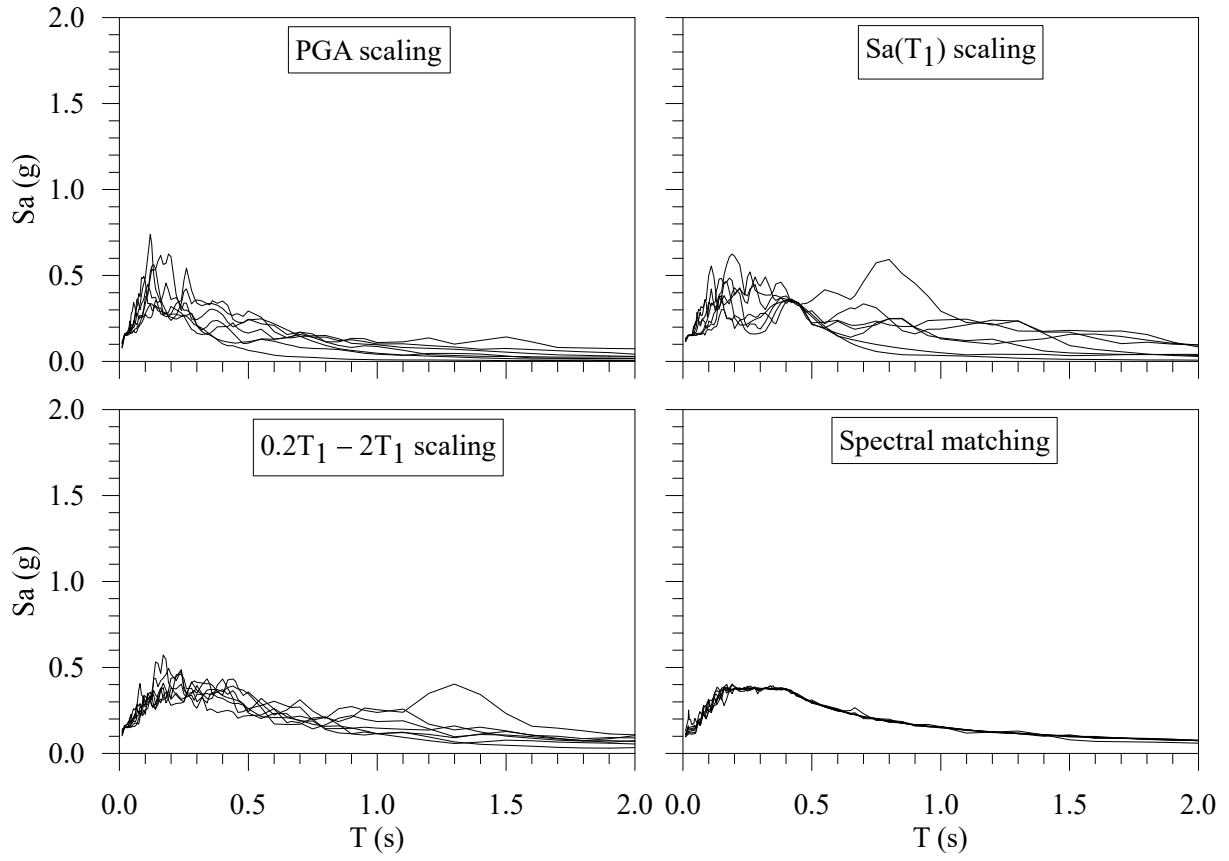

Figure S11. Response spectra in terms of pseudo-acceleration referred to input motions selected according to 4 selection strategies for PGA = 0.15 g and Soil E (i.e., VS<sub>2</sub>(z) for H<sub>deposit</sub> equal to 15 m).

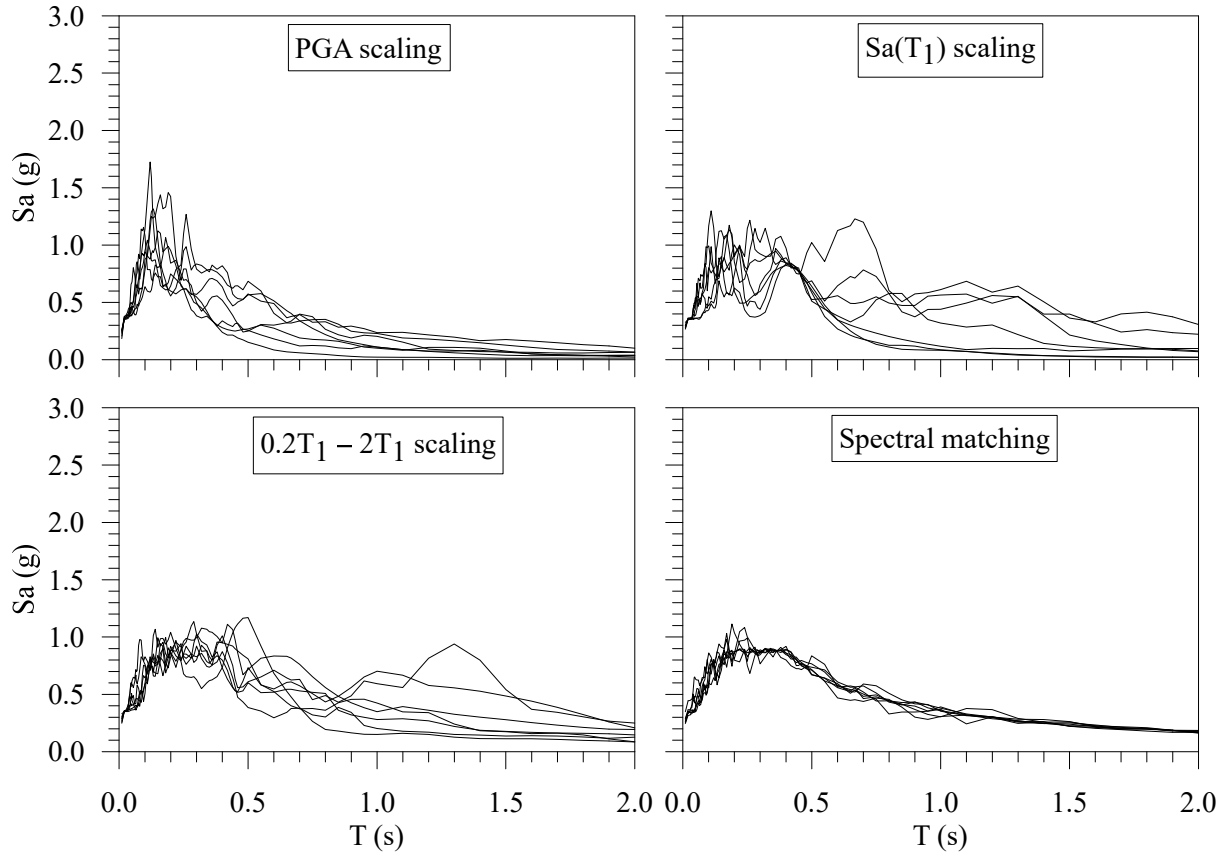

Figure S12. Response spectra in terms of pseudo-acceleration referred to input motions selected according to 4 selection strategies for PGA = 0.35 g and Soil E (i.e., VS<sub>2</sub>(z) for H<sub>deposit</sub> equal to 15 m).

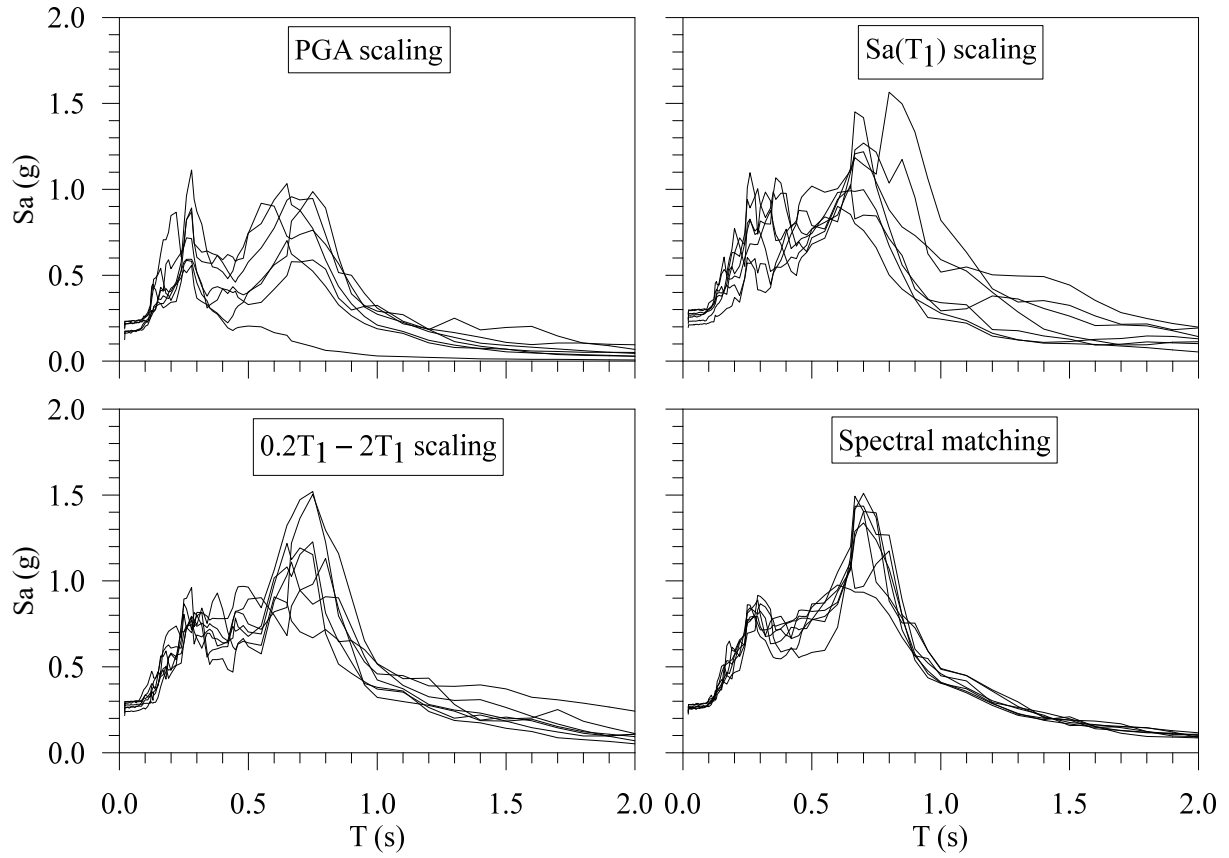

Figure S13. Response spectra in terms of pseudo-acceleration referred to the ground surface motions obtained by means of the LSSR analysis considering the input motions from the 4 selection strategies for PGA = 0.15 g and Soil C (i.e.,  $VS_1(z)$  for  $H_{\text{deposit}}$  equal to 50 m).

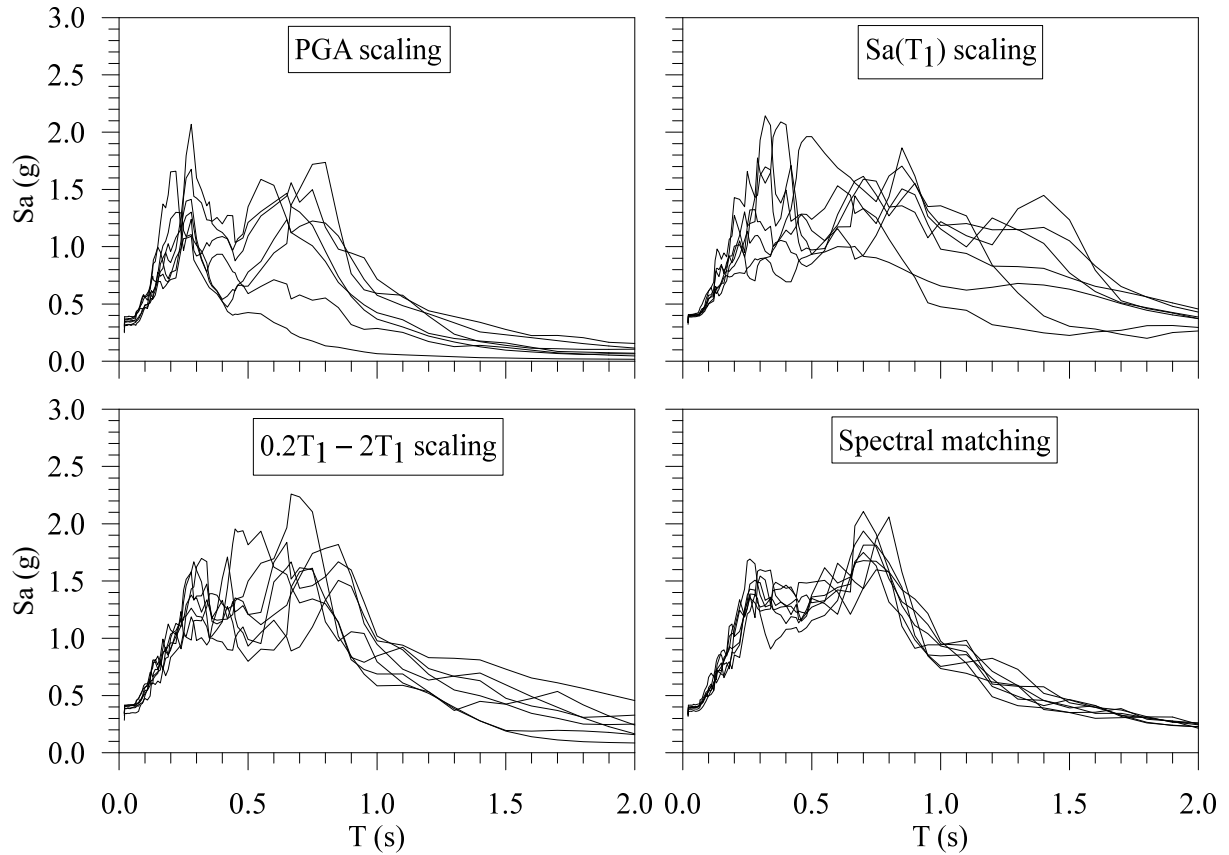

Figure S14. Response spectra in terms of pseudo-acceleration referred to the ground surface motions obtained by means of the LSSR analysis considering the input motions from the 4 selection strategies for PGA = 0.35 g and Soil C (i.e.,  $VS_1(z)$  for  $H_{\text{deposit}}$  equal to 50 m).

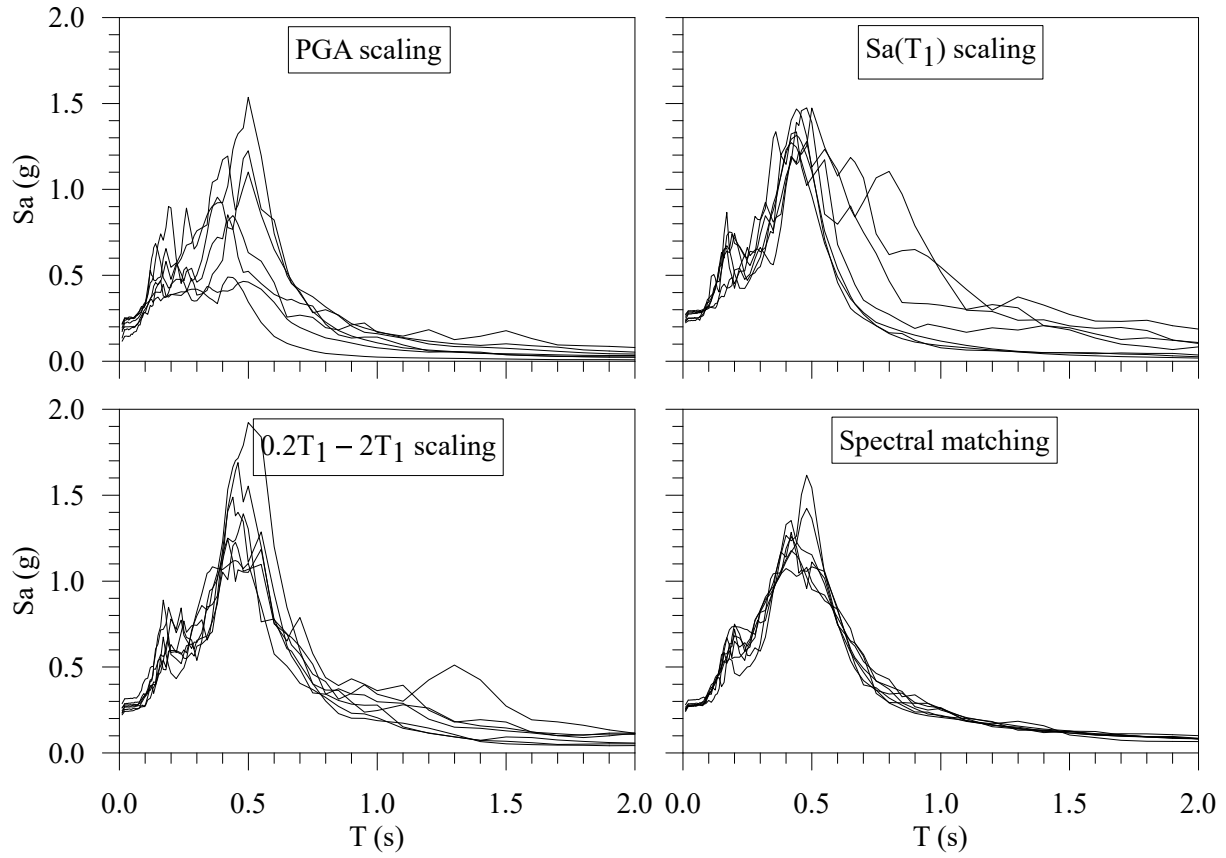

Figure S15. Response spectra in terms of pseudo-acceleration referred to the ground surface motions obtained by means of the LSSR analysis considering the input motions from the 4 selection strategies for PGA = 0.15 g and Soil C (i.e., VS<sub>1</sub>(z) for H<sub>deposit</sub> equal to 30 m).

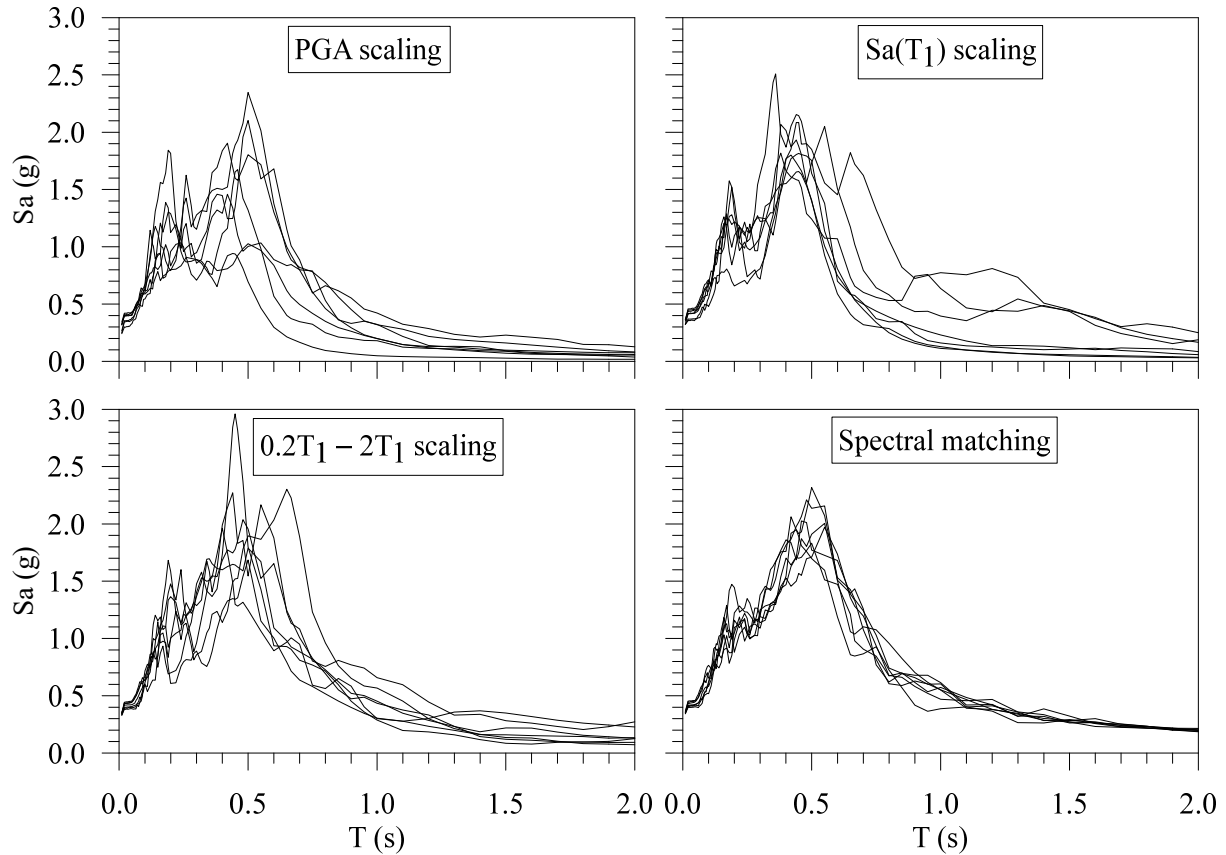

Figure S16. Response spectra in terms of pseudo-acceleration referred to the ground surface motions obtained by means of the LSSR analysis considering the input motions from the 4 selection strategies for PGA = 0.35 g and Soil C (i.e., VS<sub>1</sub>(z) for H<sub>deposit</sub> equal to 30 m).



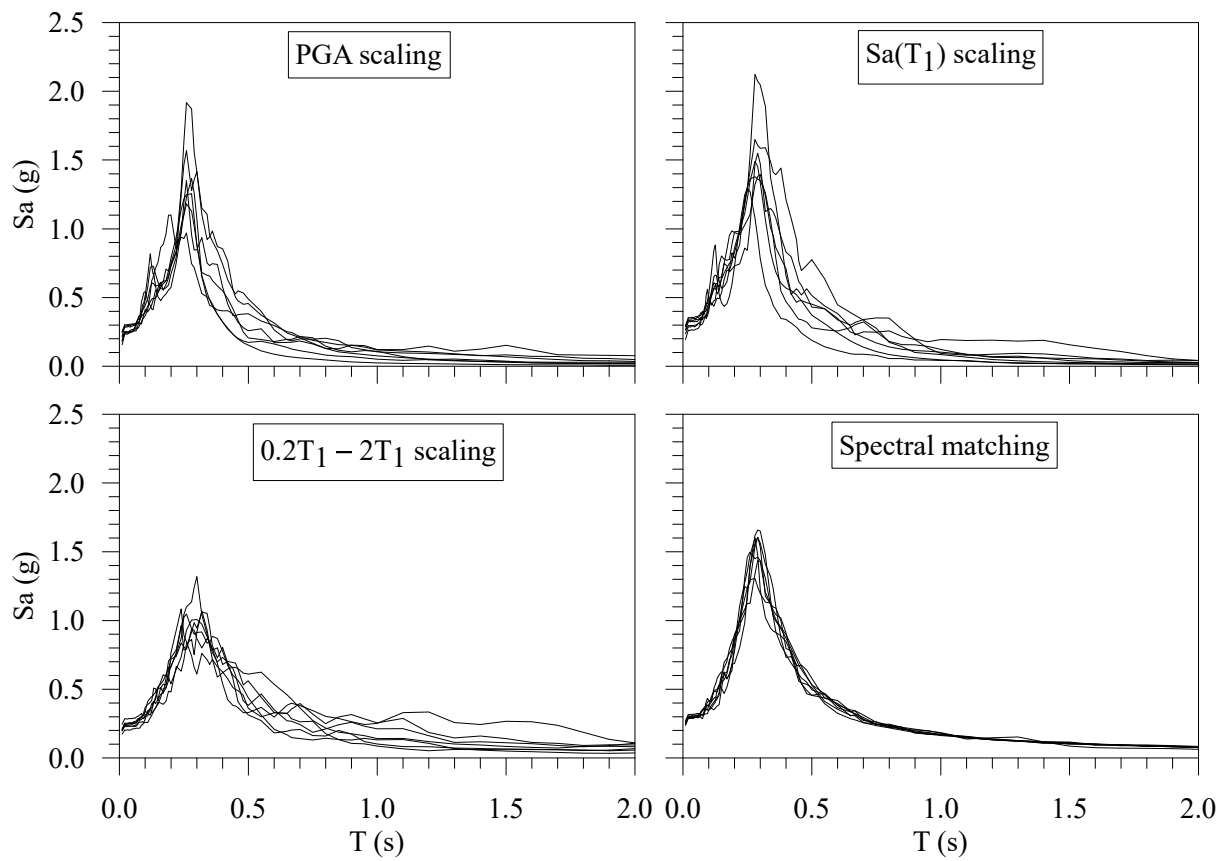

Figure S17. Response spectra in terms of pseudo-acceleration referred to the ground surface motions obtained by means of the LSSR analysis considering the input motions from the 4 selection strategies for PGA = 0.15 g and Soil E (i.e., VS<sub>1</sub>(z) for H<sub>deposit</sub> equal to 15 m).

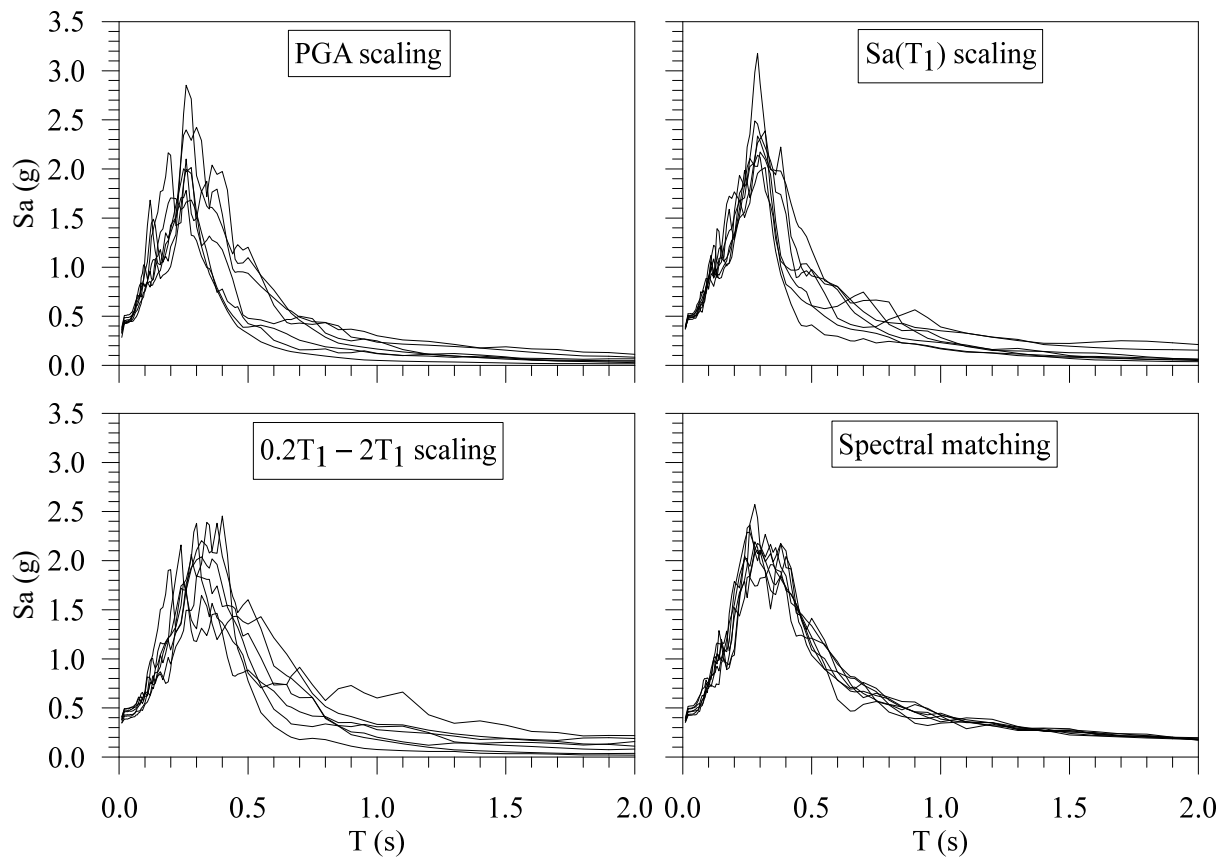

Figure S18. Response spectra in terms of pseudo-acceleration referred to the ground surface motions obtained by means of the LSSR analysis considering the input motions from the 4 selection strategies for PGA = 0.35 g and Soil E (i.e., VS<sub>1</sub>(z) for H<sub>deposit</sub> equal to 15 m).

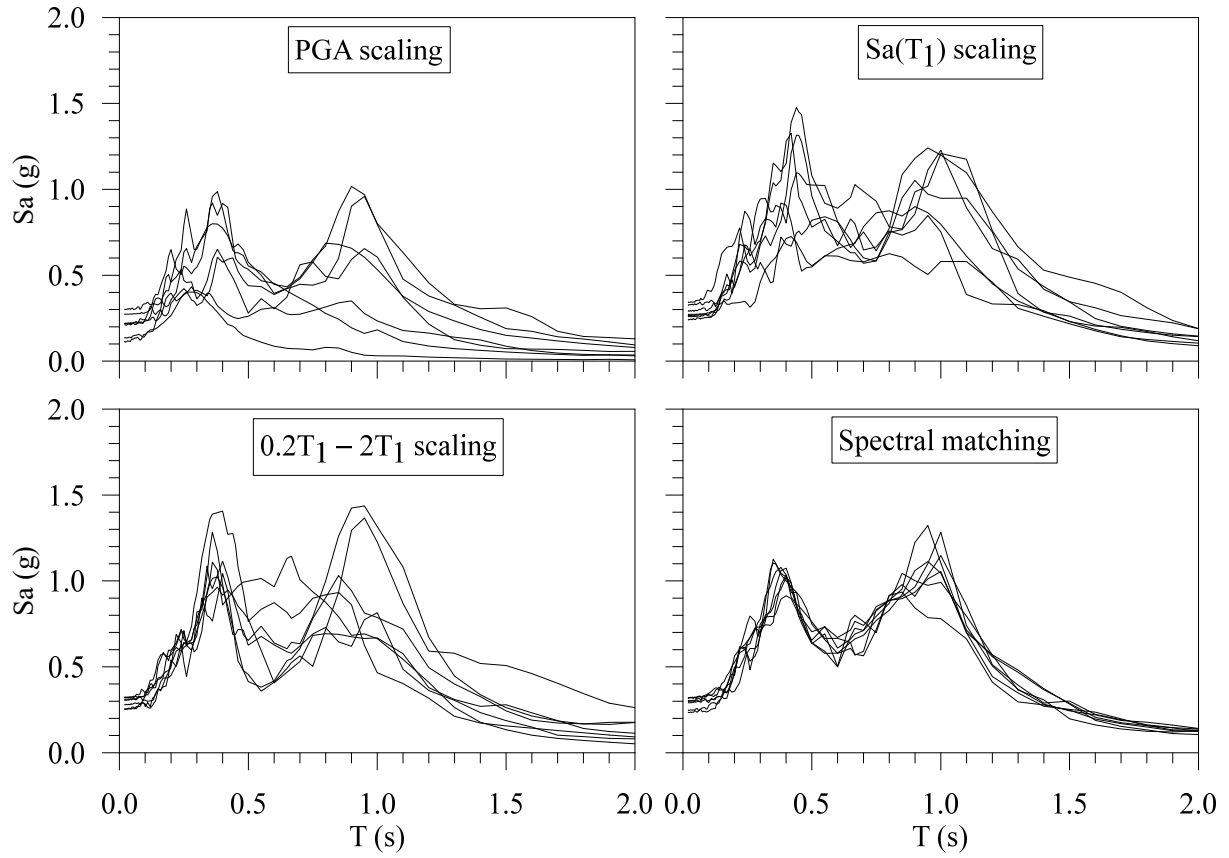

Figure S19. Response spectra in terms of pseudo-acceleration referred to the ground surface motions obtained by means of the LSSR analysis considering the input motions from the 4 selection strategies for PGA = 0.15 g and Soil D (i.e., VS<sub>2</sub>(z) for H<sub>deposit</sub> equal to 50 m).

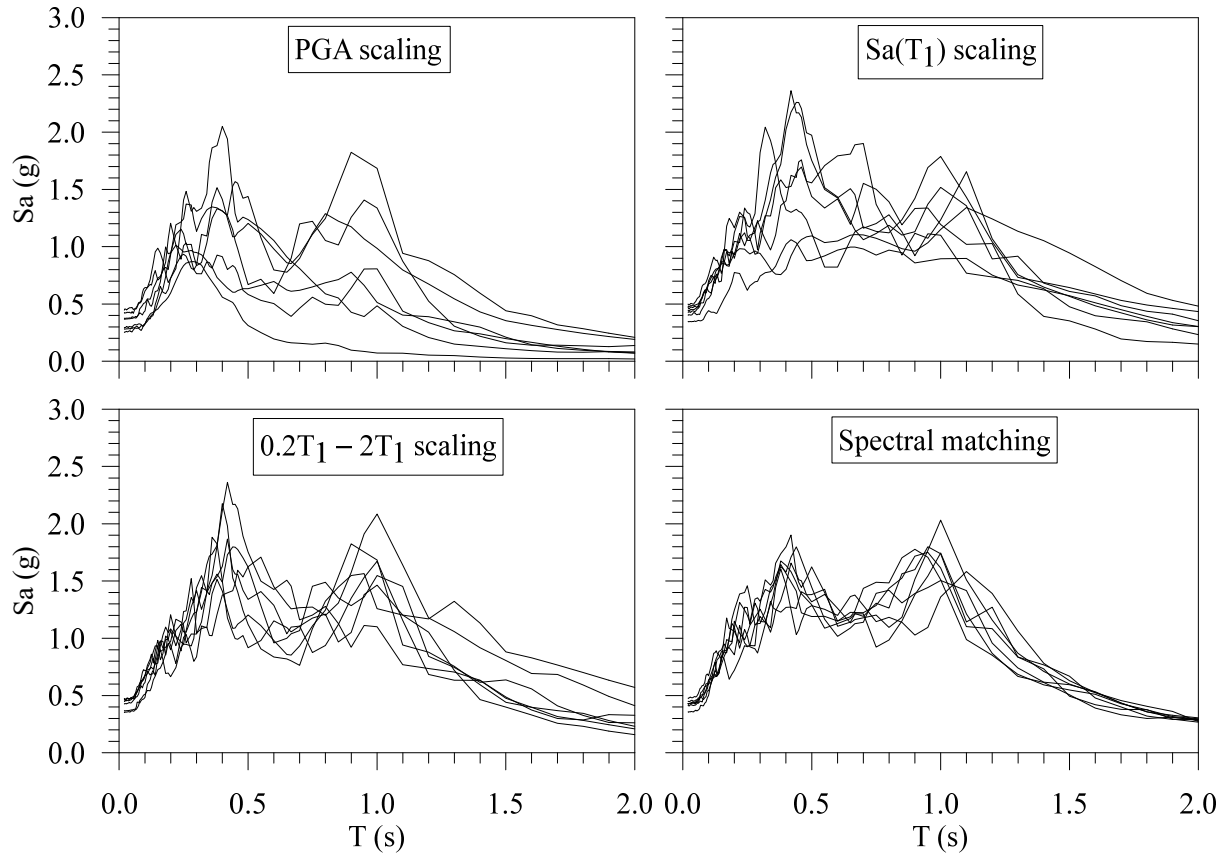

Figure S20. Response spectra in terms of pseudo-acceleration referred to the ground surface motions obtained by means of the LSSR analysis considering the input motions from the 4 selection strategies for PGA = 0.35 g and Soil D (i.e., VS<sub>2</sub>(z) for H<sub>deposit</sub> equal to 50 m).

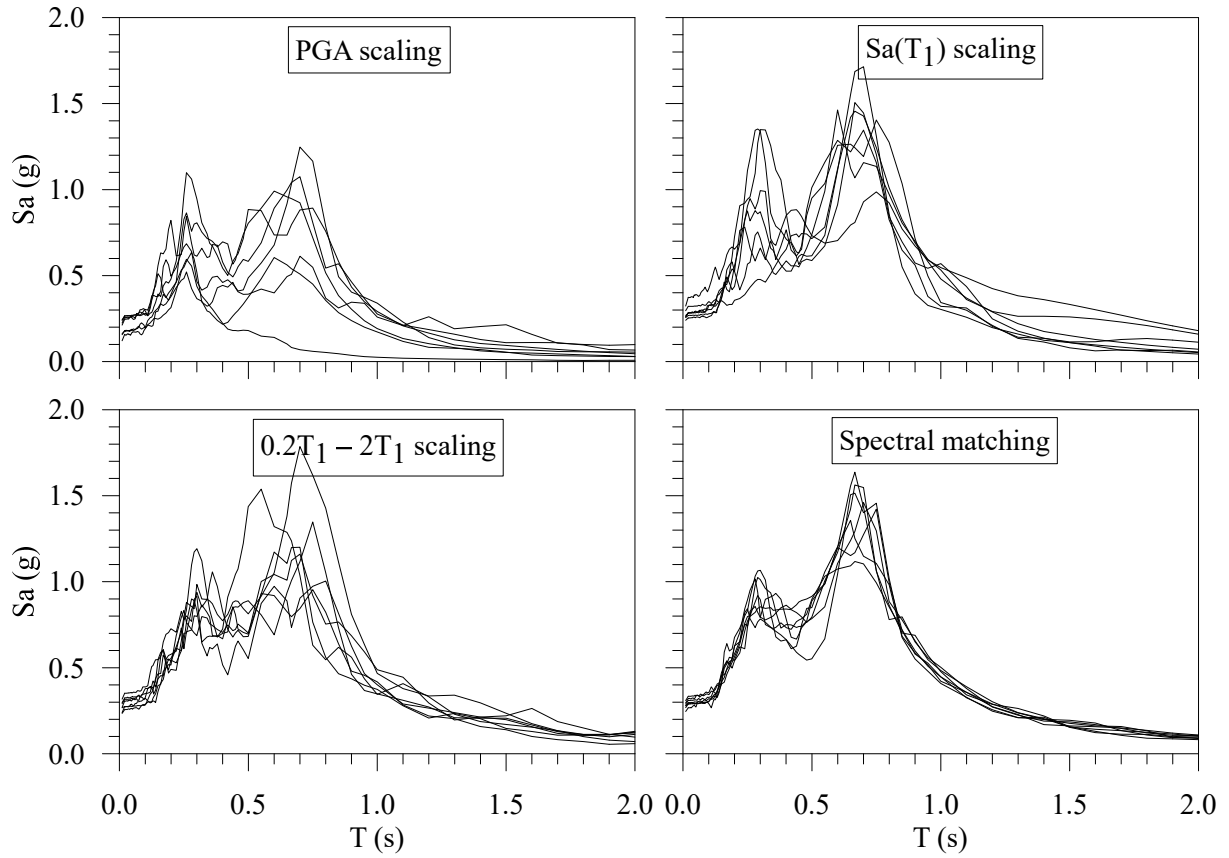

Figure S21. Response spectra in terms of pseudo-acceleration referred to the ground surface motions obtained by means of the LSSR analysis considering the input motions from the 4 selection strategies for PGA = 0.15 g and Soil D (i.e., VS<sub>2</sub>(z) for H<sub>deposit</sub> equal to 30 m).

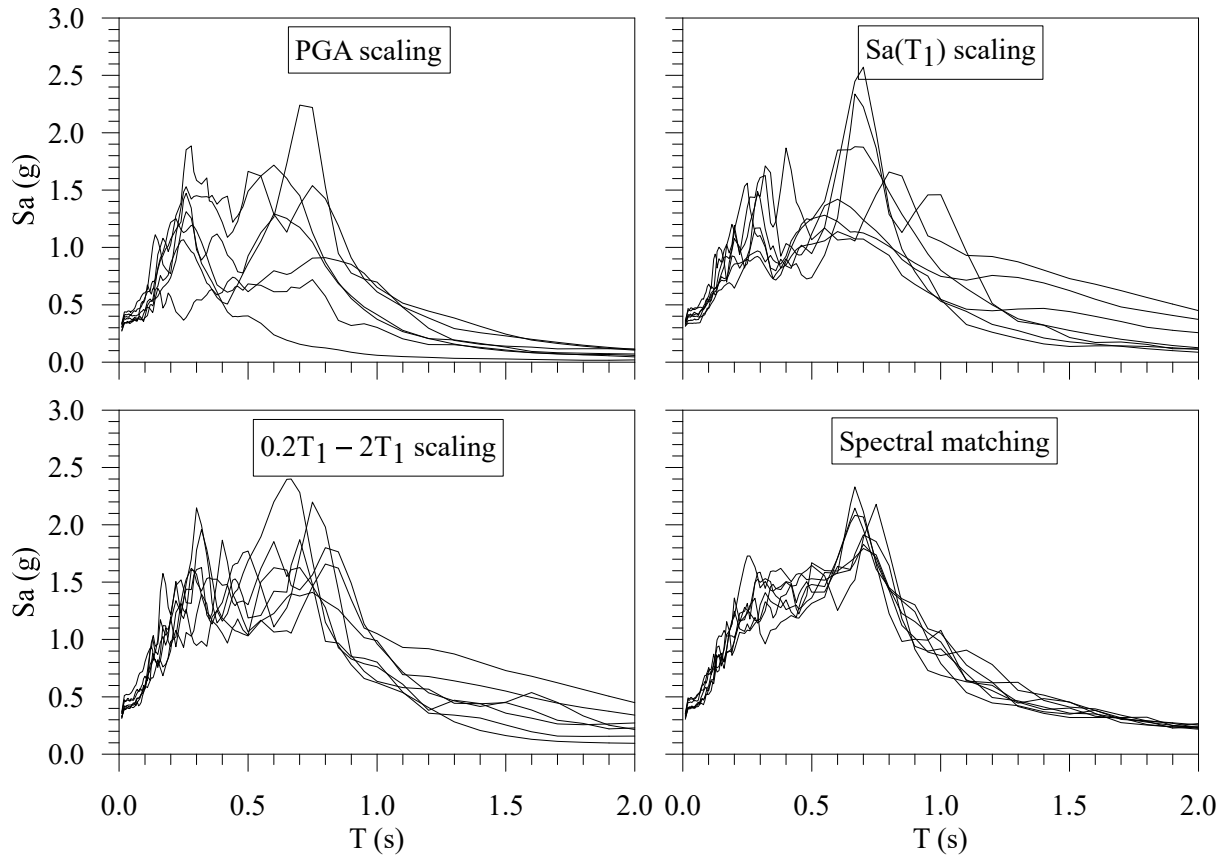

Figure S22. Response spectra in terms of pseudo-acceleration referred to the ground surface motions obtained by means of the LSSR analysis considering the input motions from the 4 selection strategies for PGA = 0.35 g and Soil D (i.e., VS<sub>2</sub>(z) for H<sub>deposit</sub> equal to 30 m).

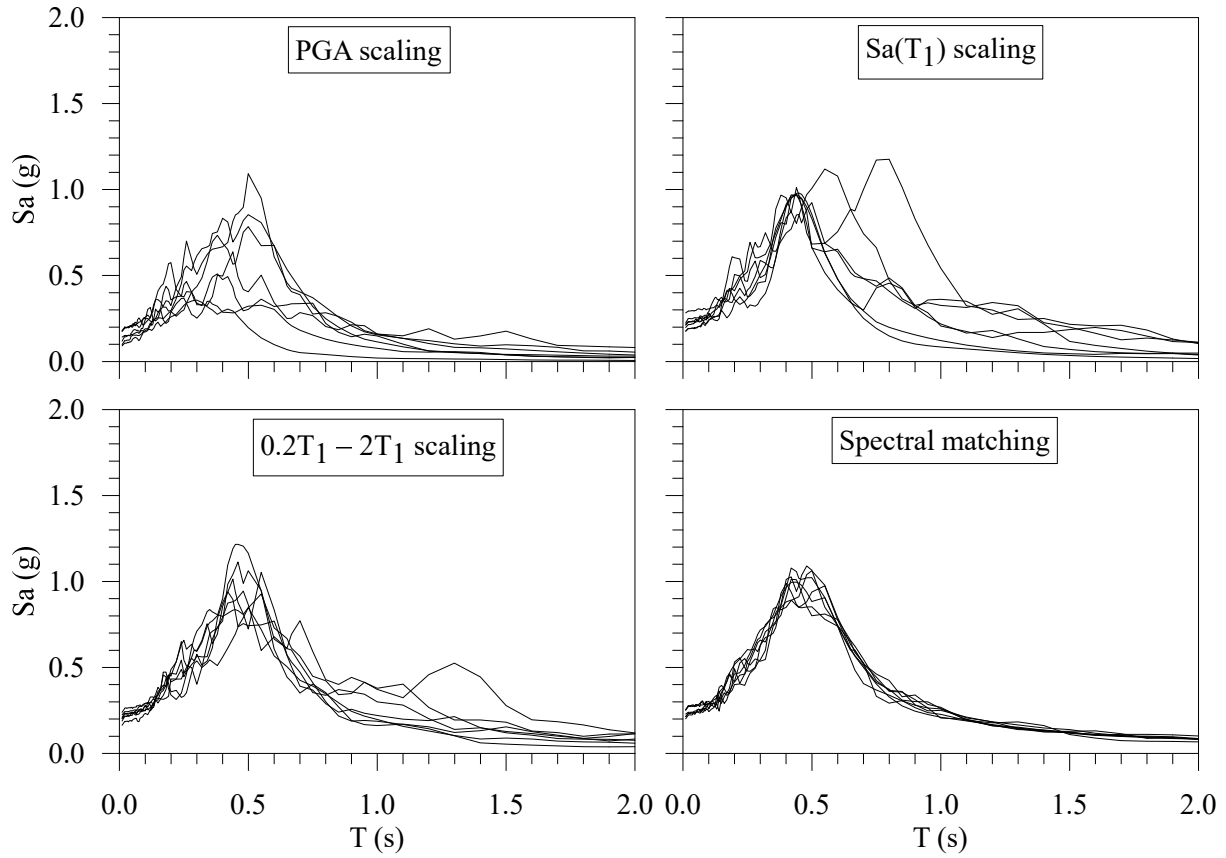

Figure S23. Response spectra in terms of pseudo-acceleration referred to the ground surface motions obtained by means of the LSSR analysis considering the input motions from the 4 selection strategies for PGA = 0.15 g and Soil E (i.e., VS<sub>2</sub>(z) for H<sub>deposit</sub> equal to 15 m).

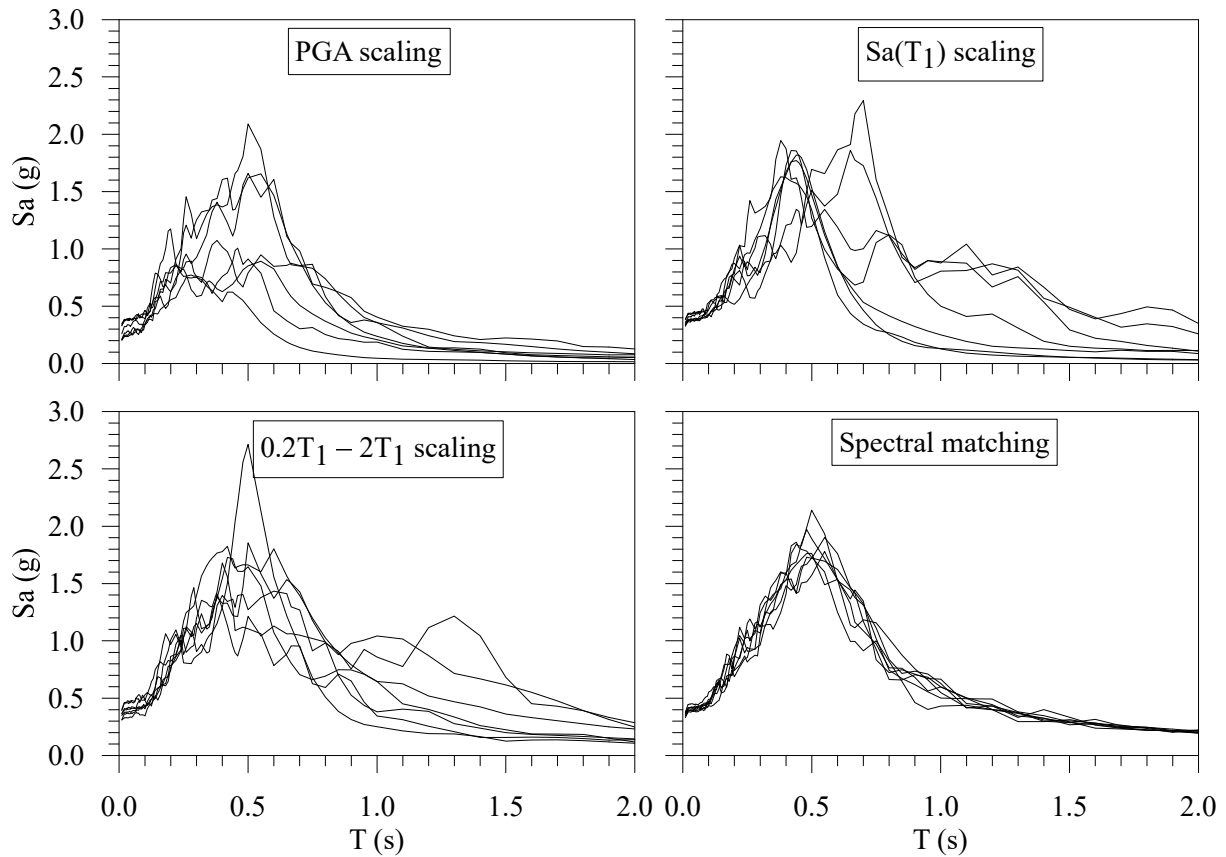

Figure S24. Response spectra in terms of pseudo-acceleration referred to the ground surface motions obtained by means of the LSSR analysis considering the input motions from the 4 selection strategies for PGA = 0.35 g and Soil E (i.e., VS<sub>2</sub>(z) for H<sub>deposit</sub> equal to 15 m).
